1 **Cryogenically preserved RBCs support gametocytogenesis of *Plasmodium falciparum* in**  
2 ***vitro* and gametogenesis in mosquitoes.**

3 Ashutosh K. Pathak<sup>1\*</sup>, Justine C. Shiau<sup>1</sup>, Matthew B. Thomas<sup>2</sup>, and Courtney Murdock<sup>1,3,4,5,6,7</sup>

4 <sup>1</sup>Dept. of Infectious Diseases, College of Veterinary Medicine, University of Georgia, Athens, GA  
5 30602.

6 <sup>2</sup>Center for Infectious Disease Dynamics and the Department of Entomology, Pennsylvania  
7 State University, State College, PA 16803.

8 <sup>3</sup>Odum School of Ecology, University of Georgia, Athens GA 30602.

9 <sup>4</sup>Center for Ecology of Infectious Diseases, University of Georgia, Athens GA 30602.

10 <sup>5</sup>Center for Tropical Emerging Global Diseases, University of Georgia, Athens GA 30602.

11 <sup>6</sup>Center for Vaccines and Immunology, University of Georgia, Athens GA 30602.

12 <sup>7</sup>Riverbasin Center, University of Georgia, Athens GA 30602.

13 \* [ash1@uga.edu](mailto:ash1@uga.edu)

14

15

16

17

18

19

20

21 **Abstract**

22 **Background**

23 The malaria Eradication Research Agenda (malERA) has identified human-to-mosquito  
24 transmission of *Plasmodium falciparum* as a major target for eradication. The cornerstone for  
25 identifying and evaluating transmission in the laboratory is small membrane feeding assays  
26 (SMFAs) where mature gametocytes of *P. falciparum* generated *in vitro* are offered to  
27 mosquitoes as part of a blood-meal. However, propagation of “infectious” gametocytes requires  
28 10-12 days with considerable physico-chemical demands imposed on host RBCs and  
29 thus, “fresh” RBCs that are  $\leq 1$ -week old post-collection are generally recommended. However,  
30 in addition to the costs, physico-chemical characteristics unique to RBC donors may confound  
31 reproducibility and interpretation of SMFAs. Cryogenic storage of RBCs (cryo-preserved RBCs  
32 herein) is approved by the European and US FDAs as an alternative to refrigeration (4°C) for  
33 preserving RBC quality and while cryo-preserved RBCs have been used for *in vitro* cultures of  
34 other *Plasmodia* and the asexual stages of *P. falciparum*, none of the studies required RBCs to  
35 support parasite development for  $>4$  days.

36 **Results**

37 Using the standard laboratory strain, *P. falciparum* NF54, we first demonstrate that cryo-  
38 preserved RBCs preserved in the gaseous phase of liquid nitrogen and thawed after storage for  
39 1, 4, 8 and 12 weeks, supported gametocytogenesis *in vitro* and subsequent gametogenesis  
40 in *Anopheles stephensi* mosquitoes. Using data from 11 SMFAs and RBCs from 4 separate  
41 donors with 3 donors re-tested following various periods of cryo-preservation, we show that  
42 overall levels of sporogony in the mosquito, as measured by oocyst prevalence and burdens in  
43 the midguts and sporozoites in salivary glands, were similar or better than using  $\leq 1$ -week old

44 refrigerated RBCs. Additionally, the potential for cryo-preserved RBCs to serve as a universal  
45 substrate for SMFAs is shown for a Cambodian isolate of *P. falciparum*.

## 46 **Conclusions**

47 Considering the suitability of cryo-preserved RBCs for *P. falciparum* SMFAs, we suggest  
48 guidelines for their use and how they can be integrated into an existing laboratory/insectary  
49 framework with the potential to significantly reduce running costs and provide greater reliability.  
50 Finally, we discuss scenarios where cryo-preserved RBCs may be especially useful in  
51 enhancing our understanding and/or providing novel insights into the patterns and process  
52 underlying human-to-mosquito transmission.

## 53 **Keywords**

54 *Anopheles stephensi*, cryogenic preservation, gametogenesis, malaria, *Plasmodium falciparum*,  
55 RBCs, SMFAs, transmission.

## 56 **Background**

57 Incidence of malaria due to *Plasmodium falciparum* has seen a steady decline in the last 15-20  
58 years, enabled primarily by the synergy between drug-combination therapies for case/disease  
59 management and vector control programs [1, 2]. Since transmission to the mosquito is thought  
60 to be a severe bottleneck in the parasite's life history, considerable effort has been channeled  
61 towards identifying parasite and vector traits influencing transmission to the mosquito with the  
62 aim of designing and testing small molecule inhibitors and vaccines [3-6]. The experimental  
63 model for evaluating basic parasite life history or the efficacy of various interventions typically  
64 involve small-membrane feeding assays (SMFAs), where mature male and female gametocytes  
65 of *P. falciparum* cultured *in vitro* are supplemented with naïve RBCs and offered as part of a  
66 blood-meal to female *Anopheles* spp. mosquitoes. These assays are then followed by the  
67 collection of various measures of parasite fitness in the mosquito vector [7-11]. However, in the

68 40 years since Trager and Jensen's first description of the methodology, *in vitro* cultures of  
69 transmission-competent parasite stages (the definitive measure of parasite fitness) have proven  
70 to be an arduous and labor-intensive venture with the precise mechanism(s) regulating the  
71 induction of gametocytogenesis remaining largely elusive [12-15]. Currently available  
72 methodology is a synthesis of several tools and techniques that have been elegantly  
73 summarized in two recent publications [13, 15].

74         Relative to other etiological agents of human malaria, *P. falciparum* is unique in its life-  
75 history in blood wherein the asexual replication period lasts 2 days during which approximately  
76 15% of the resulting parasite progeny is pre-destined to invade an RBC and enter an  
77 irreversible path of sexual differentiation lasting an additional 10-12 days before maturation into  
78 male and female gametocytes capable of infecting a mosquito. Most references outlining  
79 methods for growing sexual stages in RBCs *in vitro* emphasize the need for maintaining the  
80 sexual stages in fresh RBCs (i.e., storage under refrigeration for no more than 1-week from the  
81 day of collection), as the RBC must be able to support gametocytogenesis both physically and  
82 energetically during the 10 to 12-day differentiation period [13, 15-18]. However, ensuring a  
83 regular supply of commercially sourced RBCs can quickly prove to be prohibitively expensive.  
84 Additionally, variation introduced by differences in storage time of RBCs and across blood  
85 donors can potentially carry significant consequences for the reproducibility of downstream  
86 experiments and across laboratories for validating vaccine and drug efficacy for instance [9, 19-  
87 21].

88         Despite >100 years of experience in bio-banking, identifying the true "shelf-life" of  
89 refrigerated RBCs is controversial even in case of human blood transfusions [22]. While it may  
90 be possible to restore some aspects of RBC metabolism upon rejuvenation of packed RBCs  
91 with the addition of fresh nutrient-containing media, most of the storage-associated changes are  
92 simply irreversible [23-25]. As an alternative, cryo-preservation of RBCs in glycerol-based cryo-

93 protectants (storage at -65°C or below) has been suggested using procedures approved by both  
94 the United States Food and Drug Administration and the European Council [26, 27].

95 While cryo-preserved RBCs had been shown to support the growth of other etiological  
96 agents of human malaria such as *P. vivax*, a recent study demonstrated that growth rates of the  
97 asexual blood stages of *P. falciparum* in cryogenically-preserved RBCs (-196°C in the gaseous  
98 phase of liquid nitrogen) was almost identical to freshly collected blood *in vitro* [28, 29].  
99 However, none of these studies required the RBCs to sustain parasite growth for more than four  
100 days. According to current FDA guidelines, cryo-preserved RBCs thawed under sterile  
101 conditions can retain physicochemical properties for up to (at least) 14 days following the thaw  
102 date [26]. Considering how this timeframe encompasses the duration required for  
103 gametocytogenesis of *P. falciparum*, we hypothesized that cryo-preserved RBCs should also  
104 provide a suitable substrate for the culture of sexual stages of *P. falciparum*. In the current  
105 study, we were interested in determining if cryo-preserved RBCs support gametocytogenesis,  
106 and if the resulting mature gametocytes undergo gametogenesis using SMFAs with *Anopheles*  
107 *stephensi* as the definitive measure of fitness. We also addressed whether infectiousness was  
108 retained following extended periods of cryo-preservation. Lastly, although we accomplished  
109 these objectives primarily with the standard lab strain (NF54) of *P. falciparum*, we also tested  
110 the potential of cryo-preserved RBCs to serve as a substrate for supporting growth and  
111 differentiation of infectious stages of a Cambodian isolate of *P. falciparum*, CB132 [30].

## 112 **Results**

### 113 Gametocytogenesis of *P. falciparum* *in vitro*

114 Mature gametocytemia *in vitro* generally increased over time with detectable levels  
115 achieved by 12 days post-infection (figure 1). Overall trends were independent of storage  
116 method (Odds ratios (OR)= 1.31, standard error (se)=0.41,  $p=0.4$ ) or duration (OR=1.01,

117 se=0.04,  $p=0.72$ ) with most of the random variation is explained by differences between  
118 experimental block and negligible contribution by RBC donor (Table 1).

#### 119 Prevalence of *P. falciparum* in midguts of *An. stephensi* mosquitoes

120 The mean ( $\pm$ se) prevalence of mosquitoes infected with *P. falciparum* oocysts (NF54) was  
121  $53\pm 6.4\%$  ( $n=11$  SMFAs, mean mosquito midguts sampled/SMFA= 26 (range= 17-44), total  
122 number of mosquito midguts sampled=283) (figure. 2a). While prevalence was independent of  
123 storage method (OR=1.05, se=0.38,  $p=0.89$ ), the ability of cryo-preserved RBCs to culture  
124 infectious gametocytes showed a marginally insignificant decline with duration of storage  
125 (OR=0.89, se=0.18,  $p=0.07$ ) with much of the unexplained variation represented by differences  
126 across experimental blocks, although some could also be attributed to RBC donor  
127 characteristics (Table 1 and additional file 3).

#### 128 Prevalence of *P. falciparum* in the salivary glands of mosquitoes

129 The mean ( $\pm$ se) prevalence of mosquitoes carrying sporozoites of *P. falciparum* NF54 in the  
130 salivary glands was  $54\pm 5.3\%$  ( $n=10$  SMFAs, mean salivary glands sampled/SMFA= 24 (range=  
131 20-30), total number of salivary glands sampled=235) (figure 2b). Overall trends in sporozoite  
132 prevalence were independent of storage method (OR=1.35, se=0.84,  $p=0.63$ ) or duration  
133 (OR=0.93, se=0.08,  $p=0.36$ ) (Table 1). Unlike the midguts however, most of the random  
134 variation was caused by differences among infections with negligible contributions from  
135 experimental block or RBC donor (Table 1).

#### 136 Oocyst abundance and intensity in the midguts of mosquitoes

137 Mean ( $\pm$ se) oocyst abundance (oocyst counts from all sampled midgut) was  $5.4\pm 2.53$  ( $n=11$   
138 SMFAs, mean mosquito midguts sampled/SMFA= 26 (range= 17-44), total number of mosquito  
139 midguts sampled=283) while oocyst intensity (oocyst counts from infected midguts only) was  
140  $7.75\pm 2.85$  ( $n=11$  SMFAs, range of infected midguts/SMFA= 1-28, total number of mosquito

141 midguts sampled=157) (figure 3). While both abundance and intensity were independent of  
142 storage method (Incidence rates ratio for abundance (IRR)= 1.20, se=0.71, p=0.80, IRR for  
143 intensity=1.12, se=0.36, p=0.75) or duration (IRR for abundance= 0.86, se=0.1, p=0.13, IRR for  
144 intensity=0.95, se=0.07, p=0.48) (Table 1), most of the random variation was generated by the  
145 differences between experimental blocks with some contribution from RBC donor-specific  
146 characteristics and the least from the variation among infections.

#### 147 Gametogenesis of Cambodian isolate *P. falciparum* (CB132)

148 To determine if cryo-preservation can support infectious cultures of other strains of *P.*  
149 *falciparum*, RBC donor number 4 (additional file 2b) used for the NF54 cultures above was used  
150 as a substrate for sexual stage cultures of a clinical isolate of Cambodian origin (*P. falciparum*  
151 CB132 [30]) following storage periods of 6 (n=35 midguts and 23 salivary glands) and 8 weeks  
152 (n=49 midguts) (additional file 5). Statistical analyses were not performed due to the lack of  
153 replication in the study design.

#### 154 **Discussion**

155 Although cryogenically preserved RBCs have been shown to be suitable for culturing other  
156 *Plasmodium* species, including the asexual stages of *P. falciparum*, none of the studies ran *P.*  
157 *falciparum* cultures for more than four days [28, 29]. In the current study, we demonstrated that  
158 in addition to supporting proliferation of the asexual stages for the first 4 days, cryo-preserved  
159 RBCs were able to maintain their “qualities” as a substrate for the additional 10-12 days  
160 required for progression through the various stages of gametocytogenesis. Crucially, the fitness  
161 of the resulting sexually mature gametocytes was confirmed by successful gametogenesis and  
162 sporogony in *An. stephensi* mosquitoes.

163 Neither cryo-preservation nor duration of storage up to 12 weeks affected the ability of  
164 cryo-preserved RBCs to provide a substrate for parasite growth and differentiation of asexual

165 stages of *P. falciparum* NF54 into mature gametocytes *in vitro*. Although rates of gametocytemia  
166 were apparently higher in cryo-preserved RBCs with a decline in concentrations following a  
167 peak at 12 days post-infection (figure 1), this non-linearity was accounted for by the random  
168 variation between experimental blocks (Table 1). The most obvious difference between the  
169 blocks was the growth rates of asexual stages in the asexual feeder flasks used to initiate the  
170 gametocyte cultures in each experimental block. Although statistical models suggested a  
171 positive association with the proportions of RBCs infected with parasites at the late trophozoite  
172 stage and subsequent rates of gametocytemia, our study design precluded more robust  
173 analyses of this relationship. Indeed, future experiments with synchronized asexual feeder  
174 cultures seeded at various starting densities should help tease apart the underlying  
175 relationships, manipulation of which could help design more streamlined regimes for inducing  
176 gametocytogenesis. Nevertheless, the relationship between late trophozoites in asexual feeder  
177 flasks and future gametocytemia has been suggested by others [13] and taken together, our  
178 observations lend further support to the importance of considering parasite fitness at the  
179 asexual stages and subsequent gametocytogenesis *in vitro*.

180         The rates of gametocytemia *in vitro* were not entirely reflected in the patterns of oocyst  
181 prevalence of *P. falciparum* NF54 in midguts of *An. stephensi* mosquitoes. Although not  
182 significant, the ability of cryo-preserved RBCs to support infectious gametocytes suggested a  
183 gradual decline after 12 weeks of storage. Although this trend was likely driven by one of the  
184 two biological replicates representing 12 weeks of cryo-preservation, to be conservative, we  
185 suggest restricting the use of cryo-preserved RBCs to 8-weeks if the objective is to perform  
186 SMFAs. Whether the observed low prevalence is a donor-specific characteristic would have to  
187 be confirmed with more RBC donors representing 12 weeks of cryo-preservation, however,  
188 when considered along with the other 2 infections performed within the same experimental  
189 block (additional file 3), mean oocyst prevalence was lower relative to the other experimental



190 blocks. Indeed, refitting statistical models after excluding this infection resulted in a significant  
191 reduction in random RBC donor-introduced variation (0.17 in Table 1 to 0.04, remaining output  
192 not shown) but less so for the experimental block (0.35 to 0.19), suggesting that in general,  
193 while RBC donor characteristics may not be a significant source of variability in oocyst  
194 prevalence, a blocked experimental design may warrant careful consideration for SMFAs to aid  
195 robust interpretation of the results. Future experiments should help tease apart if this variability  
196 between experimental blocks is the result of 1) subtle differences between mosquito  
197 generations and/or 2) final parasite density and/or infectiousness which can vary significantly  
198 between generations [9]. Sporozoite prevalence in the salivary glands is independent of storage  
199 method and duration and largely mirrors the profiles of oocyst prevalence in the midguts, albeit  
200 with negligible random variation contributed by experimental blocks or RBC donor, with the  
201 majority resulting from differences between the 10 infections *per se*. However, this variability  
202 was being driven primarily by 1 outlier infection where prevalence was low for one of the RBC  
203 donors tested following 8 weeks of cryo-preservation, the exclusion of which was able to  
204 account for most if not all the previously unexplained variability between infections after refitting  
205 the model (data not shown). Similarly, neither oocyst abundance nor intensity were affected by  
206 maturation of gametocytes in 1-week old refrigerated or 1 to 12-week old cryo-preserved RBCs,  
207 with significant random variation across experimental blocks, infections and RBC donor. It is  
208 important to note that although we follow parasitological convention in differentiating between  
209 oocyst abundance and intensity [31], “intensity” has also been used to describe abundance in  
210 other studies [7, 9].

211         Lastly, preliminary experiments suggest that cryo-preserved RBCs should, with further  
212 refinements, support differentiation of other strains of *P. falciparum*. 6- and 8-week old cryo-  
213 preserved RBCs from one of the donors previously verified to support gametocytogenesis of  
214 NF54 was used to generate transmission-competent gametocytes of a Cambodian isolate of *P.*

215 *falciparum*, CB132 (additional file 5) [30]. The lower levels of infection relative to the standard  
216 laboratory isolate, NF54, could reflect differences in “infectiousness” between the two strains  
217 while the reduction in oocyst prevalence at 8 weeks compared to 6 weeks could be the result of  
218 random variation between experimental blocks as seen for NF54.

## 219 **Conclusions**

220 Gametocytogenesis of *P. falciparum* in RBCs cryo-preserved within 1 week of collection  
221 retained infectivity to mosquitoes for up to 12 weeks of storage, at levels similar or better than  
222 the “gold-standard” of using refrigerated 1-week old RBCs, with the observed patterns likely  
223 being governed by similar rate-limiting factors as refrigerated RBCs. However, while our results  
224 suggest that cryo-preservation might be suitable for culturing mature gametocytes *in vitro* for up  
225 to 12 weeks, their infectiousness to mosquitoes may decline after 8 weeks for some RBC  
226 donors. From an empirical perspective, the ability to culture parasites in the same donor of  
227 RBCs will increase the reproducibility of SMFAs, especially in scenarios where the contribution  
228 of RBC donor may warrant consideration. Further, the use of cryo-preserved RBCs for SMFAs  
229 is not restricted to that of the canonical NF54 isolate of *P. falciparum* and should also be  
230 applicable to other strains of *P. falciparum*, as we demonstrated for a Cambodian isolate,  
231 CB132 (additional file 6). From an economic perspective, 8 weeks offers a significant  
232 improvement over the current practice of using RBCs that are  $\leq 1$ -week old, with the potential to  
233 therefore reduce the costs by almost 7-fold. Moreover, considering how this period also aligns  
234 with the 2-month duration suggested for storing blood for maintaining breeder colonies of  
235 mosquitoes ([32] and unpublished observations), it is conceivable for laboratories to integrate  
236 SMFAs using cryo-preserved RBCs into the general mosquito rearing schedule. For instance,  
237 we routinely aliquot RBCs for cryo-preservation within 3-4 days of collection for culturing  
238 parasites *in vitro* for SMFAs, with the remainder used for maintaining mosquito breeder  
239 populations until receipt of RBCs from the next donor.

240 In a broader context, if growth and differentiation of *P. falciparum* is reduced in RBCs  
241 that have been refrigerated for different durations, i.e., >1-week, simultaneous comparisons with  
242 cryo-preserved blood may help identify physico-chemical changes in blood that are “naturally”  
243 detrimental to parasite fitness. In fact, the adverse effects of prolonged storage of refrigerated  
244 RBCs in some cases has led the FDA to recommend identifying the true shelf-life of refrigerated  
245 RBCs and towards this end, clinical researchers have started using “omics” technologies to  
246 extensively catalog storage-related physico-chemical artefacts, some of which could indeed  
247 serve as suitable starting points for comparison [23, 25]. Along the same lines, cryo-  
248 preservation has the potential to offer a superior alternative to using older, refrigerated RBCs  
249 where “storage-related artefacts”, possibly compounded by inherent differences in RBCs  
250 between donors, may influence the interpretation of assays quantifying parasite fitness and/or  
251 reproducibility across labs, for instance, while comparing mutant strains or testing for drug  
252 susceptibility [14]. Finally, if differences between RBC donors are reflected in the mechanisms  
253 and consequences of pathogenesis for instance, cryo-preservation would provide an ideal tool  
254 for replicating the observations or allow testing other parasite strains [33].

255 In summary, we anticipate our approach to be compatible with a broad range of research  
256 questions involving the biology of gametocytogenesis as well as human-to-mosquito  
257 transmission, with significant potential for integrating into existing research pipelines in addition  
258 to identifying novel avenues for target identification and therapeutic intervention. Blocking this  
259 stage of the parasite’s life-cycle is predicted to be one of the last remaining hurdles to overcome  
260 before we can declare a malaria-free world [1, 2], but for which SMFAs will continue to serve as  
261 the penultimate reference.

## 262 **Materials and Methods**

### 263 Study design

264 The overall study design is described below, and in the supplement accompanying this  
265 manuscript (additional file 1). In general, each experimental block in the current study  
266 progressed in the following manner: 1) gametocytogenesis of *P. falciparum* NF54/CB132 was  
267 initiated in refrigerated (4°C) or cryo-preserved RBCs *in vitro*, 2) cultures were maintained for  
268 14-16 days, and 3) fed to mosquitoes in SMFAs to assess the efficiency of gametogenesis and  
269 sporogony (additional file 2a).

270 To determine if cryo-preservation alters the ability of RBCs to support *P. falciparum*  
271 NF54 gametocytogenesis and mosquito infection, a nested/fully-crossed experimental design  
272 was implemented with two unique donors of RBCs serving as the basis of biological replication  
273 in two independent experimental blocks (additional file 2b, “nested design”) [34-36]. To account  
274 for any technical/biological variation arising from unknown factors independent of RBC storage  
275 method, each experimental block fulfilled three important criteria. First, mature gametocytes  
276 were cultured in refrigerated (4°C) or cryo-preserved RBCs from the same donor to ensure that  
277 any differences observed were not due to inherent differences between donors. Second,  
278 gametocyte flasks for comparing the two methods were initiated from the same asexual seed  
279 culture since parasite fitness can vary over generations, which in turn can introduce variation in  
280 induction of gametocytogenesis. Third, infectious cultures were offered to mosquitoes that were  
281 sorted from the same starting population and age post-emergence to minimize any variation in  
282 sporogony caused by inter-generational differences across mosquito cohorts. In summary  
283 therefore, each experimental block for the comparison between  $\leq 1$ -week old refrigerated and  
284 cryo-preserved RBCs would consist of the following steps: 1) the same asexual seed culture  
285 was used to initiate gametocytogenesis of *P. falciparum* NF54 in  $\leq 1$ -week old refrigerated (4°C)  
286 or cryo-preserved RBCs *in vitro*, 2) cultures maintained and monitored in parallel for 14-16 days,  
287 and 3) fed to mosquitoes from the same cohort to assess the efficiency of gametogenesis and  
288 sporogony (additional file 2). Lastly, it should be noted that due to practical constraints, that the

289 comparison between  $\leq 1$ -week old refrigerated and cryo-preserved RBCs were performed after  
290 the latter had been stored for 2-3 days.

291 In the second part of this study, we determined if duration of storage affects the ability of  
292 cryo-preserved RBCs to support transmission-competent gametocytes by assessing  
293 gametocytogenesis and infectivity to mosquitoes for parasites cultured in RBCs thawed after  
294 cryogenic storage for 4, 8 and 12 weeks. Biological replication for each storage period was  
295 again provided by RBC donors wherein 2-3 donors were tested independently for their ability to  
296 support infectious gametocytes after cryogenic storage for 4, 8 and/or 12 weeks. To fulfil the  
297 second and third criteria outlined above, we were unable to determine the effect of storage  
298 duration across all RBC donors, which resulted in a partially crossed experimental design  
299 (additional file 2b, "partially crossed design"). In this part of the study, each experimental block  
300 was defined by the following steps: 1) the same asexual seed culture was used to initiate  
301 gametocytogenesis of *P. falciparum* NF54 in cryo-preserved RBCs from 2-3 donors at 4, 8  
302 and/or 12 weeks of preservation with independent donors representing each storage period, 2)  
303 cultures maintained and monitored in parallel for 14-16 days, with 3) mature gametocytes from  
304 each flasks offered to mosquitoes from the same cohort and assessed for efficiency of  
305 gametogenesis and sporogony (additional file 2).

### 306 Chemicals and consumables

307 All reagents and consumables described herein were purchased from Fisher Scientific  
308 (Hampton, NH) unless noted otherwise.

### 309 Preparation of media components

310 Parasite culture media was prepared and stored as described previously [15], with minor  
311 modifications. Briefly, incomplete media was prepared by dissolving pre-made RPMI-1640  
312 powdered media in distilled water before adding 2% sodium bicarbonate (w/v) and 0.005%

313 hypoxanthine (w/v, Sigma-Aldrich, St. Louis, MO). The incomplete media was then filter-  
314 sterilized with 0.2  $\mu\text{m}$  filters under vacuum before moving to storage at  $-20^{\circ}\text{C}$  in aliquot sizes of  
315 450 or 900 mls. Complete media was prepared just prior to use by adding 50 or 100mls of 10%  
316 A+ non-heat inactivated human serum (Valley Biomedical, Winchester, VA) to 450 or 900mls to  
317 thawed, incomplete media respectively. Media was dispensed into 45 ml aliquots in 50 ml  
318 conical-bottom tubes and the air-liquid interface sparged for 5-10 seconds with a micro-  
319 aerophilic gas mixture of 5%  $\text{CO}_2$ , 5%  $\text{O}_2$  and 90%  $\text{N}_2$  (referred to herein as “tri-gas mixture”,  
320 Airgas LLC, Kennesaw, GA) prior to storage for 1 week. Since “quality” of serum is critical for  
321 culturing transmission competent parasites, serum samples were tested as described previously  
322 [15]. Serum from 14 individuals was pooled into pairs and tested for their ability to support  
323 gametocytogenesis as well as ex-flagellation of male gametocytes in case of *P. falciparum*  
324 isolate NF54 (unpublished observations). The same pool of serum donors was used to culture  
325 *P. falciparum* NF54 for the duration of this study.

#### 326 Cryo-preservation and thawing of RBCs

327 Cryo-preservation of RBCs was performed 3-4 days after collection as suggested elsewhere  
328 [27, 37]. Procedures for freezing and thawing were adapted from Sputtek [37] and Goheen et al  
329 [28] with minor modifications. Two-fold concentrated stocks of cryo-protectant were prepared in  
330 deionized water by warming a solution of 28% glycerol (v/v), 3% sorbitol (v/v from a 1M stock)  
331 and 0.65% (w/v) sodium chloride (NaCl) prior to sterilization with a 0.2  $\mu\text{m}$  filter and storage at  
332 room temperature. Whole blood (~500ml units, Valley Biomedical, Winchester, VA or Interstate  
333 Blood Bank, Memphis, TN) was dispensed in 45 ml aliquots and either stored refrigerated at  $4^{\circ}\text{C}$   
334 until use (see next section) or allowed to warm to room temperature prior to cryo-preservation.  
335 To ensure reproducible recovery of viable RBCs following cryo-preservation, it is critical for the  
336 cryo-protectant and RBCs to be at the same temperature (e.g., room temperature), prior to use  
337 [37].

338 Aliquots of whole blood, no more than 3-4 days post-collection, were centrifuged at  
339 1800xg for 10 minutes at room temperature at a low brake setting and plasma and white blood  
340 cell layers aspirated under vacuum before an equal volume of cryo-protectant solution (~20-  
341 25mls) was added to the packed RBC pellet to achieve a final glycerol concentration of 14%  
342 (v/v) and a hematocrit of ~50%. The packed RBCs were then equilibrated with the cryo-  
343 protectant for 15-20 minutes with gentle intermittent mixing. Glycerolized RBCs were then  
344 dispensed in 2 ml aliquots and snap-frozen by immersing in liquid nitrogen for 2-3 minutes  
345 before transferring to the vapor phase for long-term storage. Cryo-preserved RBCs were  
346 thawed just before use by incubating cryogenic vials in a dry bath for 5 minutes at 37°C before  
347 transferring the contents into a 15 or 50 ml conical bottom tube prior to de-glycerolization.  
348 Unless stated otherwise, all solutions for de-glycerolization were prepared in deionized water  
349 and sterilized with 0.2µm filters before storage at room temperature. De-glycerolization was  
350 initiated with the addition of successive gradients of sodium chloride concentrations starting with  
351 0.4mls (0.2 volumes) of 12% NaCl (w/v in distilled water) added dropwise under gentle agitation  
352 (~1 minute). The mixture was then incubated at room temperature for 5 minutes with gentle  
353 intermittent mixing before dropwise addition of 10mls (5 volumes) of sterile 1.6% NaCl (w/v in  
354 distilled water). The de-glycerolized RBC suspension was centrifuged at 1000xg for 3 minutes at  
355 20-23°C and low brakes and 20mls (10 volumes) of a salt-dextrose solution (0.9% NaCl + 0.2%  
356 dextrose, w/v in distilled water) added dropwise to the packed RBC pellet under gentle agitation.  
357 If hemolysis was still observed in the supernatant, the packed RBCs were washed once more  
358 with the same volume of salt-dextrose solution. Finally, the thawed RBCs were resuspended in  
359 complete media before use. Recoveries of ~0.8-0.9mls of packed RBCs should be considered  
360 routine.

361 Preparation of refrigerated RBCs

362 On the day of use, but  $\leq 1$ -week post-collection, a 45 ml aliquot of whole blood was  
363 retrieved from the refrigerator and allowed to warm to room temperature before centrifugation as  
364 described in the preceding section. The plasma and white blood cell layers were aspirated  
365 before the addition of an equal volume of incomplete media (~20-25mls), also at room  
366 temperature. RBCs were gently suspended in incomplete media before centrifugation for 3  
367 minutes at 1000xg and low brake setting. Packed RBCs were washed two more times before  
368 resuspension in an equal volume of complete media to achieve a final hematocrit of ~50%.

### 369 Cultures of asexual stage *P. falciparum*

370 *P. falciparum* isolate NF54 was obtained from BEI Resources, NIAID, NIH ("*Plasmodium*  
371 *falciparum*, Strain NF54 (Patient Line E), product number MRA-1000, contributed by Megan G.  
372 Dowler"). Asexual feeder cultures were routinely sub-cultured in T25 or T75 flasks in a volume  
373 of 5 or 15mls of complete media respectively, with final hematocrit of 5% and ring state  
374 parasitemia ranging from 0.1-1%. The same volume of media was replaced every 24 hours and  
375 then sparged gently at the air-liquid interface with the tri-gas mixture for 15-20 seconds.  
376 Parasitemia was monitored every 1-2 days by transferring 50-100  $\mu$ l of parasite culture to a  
377 0.6ml tube, centrifuged at 1800xg for 1 minute and supernatants aspirated until final culture  
378 volume was ~15-20  $\mu$ l. The RBC pellet was re-suspended with repeated pipetting before  
379 preparing smears with 2  $\mu$ l of the concentrate on glass slides. Slides were dried on a slide-  
380 warmer for 20-30 seconds and then fixed by submerging in 100% Methanol for 10 seconds prior  
381 to Giemsa staining. Concentrated Giemsa stain (Sigma-Aldrich, St. Louis, MO) was filtered in  
382 aliquot sizes of 30-35mls with a Whatman no. 1 filter paper and stored at room temperature.  
383 Just before use, the filtered stain was diluted to a ratio of 1:20 (v/v) in phosphate-buffered saline  
384 (pH 7.2) and fixed slides immersed in the stain in glass Coplin-jars for 10-15 minutes at room  
385 temperature. Stained sides were washed under running tap-water for 5-10 seconds with the  
386 smeared side facing downwards before being air-dried for microscopy. Smears were mounted



387 directly in immersion oil (Cargille Labs, Cedar Grove, NJ) and examined at 1000x magnification  
388 with a Leica DM2500 upright microscope (Leica Microsystems, Buffalo Grove, IL). Parasitemia  
389 was estimated from ~1000 RBCs and staged into early trophozoites (referred to herein as  
390 rings), late trophozoites and schizonts following guidelines described previously [13, 38]. Ring-  
391 stage parasitemia expressed as a proportion of RBCs counted was used to prepare flasks for  
392 routine sub-culture and/or gametocytogenesis [15].

### 393 Cultures of the sexual stages (gametocytes) of *P. falciparum*

394 Flasks destined for gametocytogenesis were only initiated when ring-stage parasitemia  
395 in the asexual seed flasks above showed exponential increase in growth rates (>6-8 fold)  
396 relative to the previous sampling point. Flasks for gametocytogenesis were prepared essentially  
397 as described above. Briefly, freshly thawed or refrigerated RBCs resuspended in pre-warmed  
398 (37°C) complete media at 5% hematocrit (e.g., 1mls naïve RBCs in 20mls complete media)  
399 were seeded with asexual cultures to achieve a final ring-stage density of 0.6-1% in the  
400 gametocyte flasks and returned to an incubator maintained at 37°C. Media in flasks was  
401 replaced every 24 hours with 15mls of fresh pre-warmed (37°C) complete media and sparged  
402 with tri-gas mixture for 10-30 seconds. All manipulations outside the incubator were performed  
403 by placing the flask on a slide-warming platform maintained at 38°C (MedSupply Partners,  
404 Atlanta, GA). Gametocyte flasks were maintained for 14-16 days and parasitemia monitored  
405 with Giemsa staining at 1, 4, 8, 12 and 14 days post-infection as suggested previously [15].  
406 Asexual stages were staged as described above and gametocytes were further classified into  
407 stages II, III, IV and V male or V female gametocytes using guidelines established previously  
408 [13, 38] (additional file 4a and S4b). Stage I gametocytes were excluded from the counts as  
409 they are virtually indistinguishable morphologically from late trophozoites, especially in  
410 asynchronous cultures [39]. Finally, maturation status of the culture was assessed from 12 days  
411 post-infection by quantifying ex-flagellation of male stage V gametocytes in a Neubauer

412 hemocytometer chamber as suggested previously [15]. Briefly, after adding fresh media, 10  $\mu$ l of  
413 culture was pipetted directly into the chambers of a hemocytometer and incubated at 21-24°C  
414 for 15-20 minutes before quantification (additional file 4c). Imaging was performed at 400x  
415 magnification on a Leica DM2500 equipped with differential interference contrast (DIC) optics.  
416 Cultures were deemed infectious only when ex-flagellation was observed and offered to  
417 mosquitoes within 24-48 hours.

418 *P. falciparum* Cambodian isolate CB132 (kind gift of Prof. Dennis E Kyle, University of  
419 Georgia, Athens, GA, USA) [30] was cultured under similar conditions to NF54 with the  
420 exception that flasks destined for gametocytogenesis were seeded at a density of 0.5%.

#### 421 Mosquito husbandry

422 *An. stephensi* mosquitoes were maintained in a level 2 Arthropod Containment Laboratory at  
423 the University of Georgia, which were initiated from eggs kindly provided by the Walter Reed  
424 Army Institute of Research ca. 2015 is a wild-type strain referred to as “Strain Indian” [10, 40].  
425 Colonies were housed in a dedicated walk-in environmental chamber (chamber (Percival  
426 Scientific, Perry, IA) at 27°C  $\pm$  0.5°C, 80%  $\pm$ 5% relative humidity, and under a 12 hr light: 12 hr  
427 dark photo-period schedule. Adult mosquitoes were maintained on 5% dextrose and provided  
428 whole human blood offered in glass-jacketed feeders (Chemglass Life Sciences, Vineland, NJ)  
429 through parafilm membrane maintained at 37°C to support egg production. Husbandry  
430 procedures were established according to guidelines as suggested elsewhere [32] with minor  
431 modifications. Briefly, eggs were rinsed twice with 1% house-hold bleach (v/v, final  
432 concentration of 0.06% sodium hypochlorite) before surface-sterilization for 1 minute in the  
433 same solution at room temperature. Bleached eggs were washed with 4-5 changes of deionized  
434 water and transferred to clear plastic trays (34.6cm L x 21.0cm W x 12.4cm H) containing 500  
435 ml of deionized water and 2 medium pellets of Hikari Cichlid Gold fish food (HikariUSA,  
436 Hayward, CA) and allowed to hatch for 48 hours. Hatched L1 larvae were dispensed into clear

437 plastic trays (34.6cm L x 21.0cm W x 12.4cm H) at a density of 300 larvae/1000 ml water and  
438 provided the same diet until pupation. The feeding regime consisted of 2 medium pellets  
439 provided on the day of dispensing (day 0) followed by the provision of a further 2, 4, 4 and 4  
440 medium pellets on days 4, 7, 8 and 9 respectively. This regime allows >85% larval survival and  
441 >90% pupation within 11 days with a sex ratio of 1:1 adult males and females (unpublished  
442 observations).

#### 443 Mosquito infections

444 All steps outlined below were performed with pre-warmed (38°C) equipment, including  
445 tubes, pipettes, pipette tips and centrifuge rotor buckets. Cultures deemed infectious were  
446 concentrated by centrifugation at 1800xg for 1-2 minutes at room temperature in pre-weighed  
447 15 or 50 ml conical bottom centrifuge tubes. Supernatants were aspirated under vacuum and  
448 the weight/volume of the concentrate estimated by weighing the tube and subtracting the value  
449 of the pre-weighed empty tube. 3-6 volumes of a freshly washed and pre-warmed mixture of  
450 RBCs resuspended in freshly thawed serum (30% hematocrit) was added to the infected RBC  
451 pellet to achieve a final hematocrit of 45-50% and mature gametocytemia of ~0.1%. The  
452 volumes of naïve RBCs and serum mixture to be added was informed by the densities recorded  
453 in the gametocyte flasks on the day of infection. The mixture of naïve and parasitized RBCs was  
454 then fed immediately to 60-80 (3-7 day old) female *An. stephensi* mosquitoes for 15-20 minutes.  
455 To facilitate high blood feeding rates, mosquitoes were previously starved for 16-24 hours in  
456 dedicated environmental chambers programmed to fluctuate a total of 9°C around a daily mean  
457 of 24°C with 80%  $\pm$ 5% relative humidity and a 12h light:dark photo-period schedule (Percival  
458 Scientific, Perry, IA) as described previously [10]. After the blood-feeds, feeding status was  
459 qualitatively ascertained and engorged mosquitoes selected for by extending the starvation  
460 period for a further 24-48 hours to eliminate non-blood-fed mosquitoes [41].

461 To quantify parasite densities in the infectious feed, Giemsa stained smears were  
462 prepared from a 2  $\mu$ l aliquot of the infectious blood meal offered to mosquitoes, as described  
463 above. Prevalence and abundance of parasites in the midguts of mosquitoes was assessed at  
464 9-13 days post-infection by dissecting midguts and counting oocysts at 400x magnification with  
465 a Leica DM2500 under DIC optics (additional file 4d). Sporozoite prevalence was assessed at  
466 17-21 days post-infection by dissecting salivary glands into 5  $\mu$ l of PBS. Glands were ruptured  
467 by overlaying a 22mm<sup>2</sup> coverslip and presence/absence of sporozoites was recorded for each  
468 mosquito at either 100x or 400x magnification with the same microscope (additional file 4e).

#### 469 Statistical modeling and data analyses

470 All data analyses were performed in RStudio (version 1.1.423) [42] running the statistical  
471 software package R (version 3.5) [43]. Due to the experimental design (see above and figures  
472 S1 and S2), generalized linear mixed-effects models (GLMMs) were used for all statistical  
473 analyses, as suggested previously [34-36]. Choice of GLMM family and corresponding link  
474 function were based on five dependent variables modeled- 1) rates of mature gametocytemia *in*  
475 *vitro*, 2) oocyst prevalence (proportion of mosquitoes with oocysts on the midgut), 3) oocyst  
476 abundance (total number of oocysts per midgut regardless of infection status), 4) oocyst  
477 intensity (number of oocysts per midgut from infected midguts only), and 5) sporozoite  
478 prevalence (proportion of mosquitoes with sporozoites in the salivary glands). For all the  
479 analyses, storage method (refrigerated vs. cryo-preserved RBCs) and duration (4, 8, and 12  
480 weeks post cryo-preservation) were specified as independent variables, with storage method  
481 and duration classified as a categorical and continuous predictor, respectively. Storage duration  
482 was centered and scaled over the grand mean. For analyzing temporal patterns of  
483 gametocytogenesis *in vitro*, GLMMs with a binomial distribution (“logit” link) were performed with  
484 the total count of RBCs infected with male and female stage V gametocytes (i.e., total mature  
485 gametocytes) expressed as a proportion of the sum of RBCs (infected and uninfected) counted

486 from each sample as the dependent variable. Oocyst and sporozoite prevalence in the midguts  
487 and salivary glands of mosquitoes, respectively, were modeled as the probability of mosquitoes  
488 being infected and infectious as dependent variables in GLMMs specified with a binomial  
489 distribution (“logit” link function). For analyzing oocyst abundance and intensity, GLMMs with  
490 negative binomial distributions (“log” link) were utilized. All statistical analyses were performed  
491 using the package “lme4” unless stated otherwise [44]. For the *in vitro* analysis, the intercepts of  
492 the relationships between the rates of mature gametocytemia and the predictor variables was  
493 allowed to vary between RBC donors as well as over sampling period (days post-infection)  
494 between experimental blocks and flasks nested within each block. The same random effect  
495 structure was specified for analyzing parasite fitness in the mosquitoes except infections/SMFAs  
496 were nested within blocks *in lieu* of flasks (additional file 2b). Tabulation of model outputs, along  
497 with tests for overdispersion were performed with the “sjstats” package. Where applicable, post-  
498 hoc comparisons of storage method and duration were performed using Tukey contrasts of the  
499 estimated marginal means derived from the models above, as suggested in the “emmeans”  
500 package [45].

501 Finally, cross-validation of the models were performed by 1) testing fit after truncating  
502 the number of mosquitoes sampled across each infection and 3) removing experimental  
503 block(s) and/or flasks/infections within each block. Where applicable, random effects were  
504 checked for normal distribution patterns and the final output tables of statistical modeling  
505 prepared with the “sjPlot” package and “sjstats” packages [46, 47]. All figures were prepared  
506 using the “ggplot2” package [48].

#### 507 **List of abbreviations**

508 DIC = differential interference contrast, GLMMs = generalized linear mixed-effects models, IRR  
509 = incidence rates ratios, OR = odds ratios, SMFAs = small membrane feeding assays.

510 Funding

511 NIH project no. 5R01AI110793-04 and the University of Georgia.

512 **References**

- 513 1. WHO: **Global technical strategy for malaria 2016–2030**. Geneva: The World Health  
514 Organization 2015.
- 515 2. Rabinovich RN, Drakeley C, Djimde AA, Hall BF, Hay SI, Hemingway J, Kaslow DC,  
516 Noor A, Okumu F, Steketee R, et al: **malERA: An updated research agenda for  
517 malaria elimination and eradication**. *PLoS Med* 2017, **14**:e1002456.
- 518 3. Kapulu MC, Da DF, Miura K, Li Y, Blagborough AM, Churcher TS, Nikolaeva D, Williams  
519 AR, Goodman AL, Sangare I, et al: **Comparative assessment of transmission-  
520 blocking vaccine candidates against *Plasmodium falciparum***. *Sci Rep* 2015,  
521 **5**:11193.
- 522 4. Hoffman SL, Vekemans J, Richie TL, Duffy PE: **The march toward malaria vaccines**.  
523 *Vaccine* 2015, **33 Suppl 4**:D13-23.
- 524 5. Stone WJ, Dantzler KW, Nilsson SK, Drakeley CJ, Marti M, Bousema T, Rijpma SR:  
525 **Naturally acquired immunity to sexual stage *P. falciparum* parasites**. *Parasitology*  
526 2016, **143**:187-198.
- 527 6. Sinden RE: **Targeting the Parasite to Suppress Malaria Transmission**. *Adv Parasitol*  
528 2017, **97**:147-185.
- 529 7. Swihart BJ, Fay MP, Miura K: **Statistical Methods for Standard Membrane-Feeding  
530 Assays to Measure Transmission Blocking or Reducing Activity in Malaria**. *Journal  
531 of the American Statistical Association* 2017:0-0.
- 532 8. Colmenarejo G, Lozano S, Gonzalez-Cortes C, Calvo D, Sanchez-Garcia J, Matilla JP,  
533 Leroy D, Rodrigues J: **Predicting transmission blocking potential of anti-malarial**

- 534            **compounds in the Mosquito Feeding Assay using *Plasmodium falciparum* Male**  
535            **Gamete Inhibition Assay.** *Sci Rep* 2018, **8**:7764.
- 536    9.    Churcher TS, Blagborough AM, Delves M, Ramakrishnan C, Kapulu MC, Williams AR,  
537            Biswas S, Da DF, Cohuet A, Sinden RE: **Measuring the blockade of malaria**  
538            **transmission--an analysis of the Standard Membrane Feeding Assay.** *Int J Parasitol*  
539            2012, **42**:1037-1044.
- 540    10.    Murdock CC, Sternberg ED, Thomas MB: **Malaria transmission potential could be**  
541            **reduced with current and future climate change.** *Sci Rep* 2016, **6**:27771.
- 542    11.    Bousema T, Dinglasan RR, Morlais I, Gouagna LC, van Warmerdam T, Awono-Ambene  
543            PH, Bonnet S, Diallo M, Coulibaly M, Tchuinkam T, et al: **Mosquito feeding assays to**  
544            **determine the infectiousness of naturally infected *Plasmodium falciparum***  
545            **gametocyte carriers.** *PLoS One* 2012, **7**:e42821.
- 546    12.    Trager W, Jensen J: **Human malaria parasites in continuous culture.** *Science* 1976,  
547            **193**:673-675.
- 548    13.    Duffy S, Loganathan S, Holleran JP, Avery VM: **Large-scale production of**  
549            ***Plasmodium falciparum* gametocytes for malaria drug discovery.** *Nat Protoc* 2016,  
550            **11**:976-992.
- 551    14.    Duffy S, Avery VM: **Routine In Vitro Culture of *Plasmodium falciparum*:**  
552            **Experimental Consequences?** *Trends Parasitol* 2018, **34**:564-575.
- 553    15.    Delves MJ, Straschil U, Ruecker A, Miguel-Blanco C, Marques S, Dufour AC, Baum J,  
554            Sinden RE: **Routine in vitro culture of *P. falciparum* gametocytes to evaluate novel**  
555            **transmission-blocking interventions.** *Nat Protoc* 2016, **11**:1668-1680.
- 556    16.    Roncales M, Vidal-Mas J, Leroy D, Herreros E: **Comparison and Optimization of**  
557            **Different Methods for the In Vitro Production of *Plasmodium falciparum***  
558            **Gametocytes.** *J Parasitol Res* 2012, **2012**:927148.

- 559 17. Brancucci NM, Goldowitz I, Buchholz K, Werling K, Marti M: **An assay to probe**  
560 ***Plasmodium falciparum* growth, transmission stage formation and early**  
561 **gametocyte development.** *Nat Protoc* 2015, **10**:1131-1142.
- 562 18. Moll K, Kaneko, Akira, Scherf, Arthur and Wahlgren, Mats: **Methods In Malaria**  
563 **Research.** 6th edition: MR4/ATCC, Manassas, VA, USA, 2013; 2013.
- 564 19. Miura K, Stone WJ, Koolen KM, Deng B, Zhou L, van Gemert GJ, Locke E, Morin M,  
565 Bousema T, Sauerwein RW, et al: **An inter-laboratory comparison of standard**  
566 **membrane-feeding assays for evaluation of malaria transmission-blocking**  
567 **vaccines.** *Malar J* 2016, **15**:463.
- 568 20. Eldering M, Bompard A, Miura K, Stone W, Morlais I, Cohuet A, van Gemert GJ, Brock  
569 PM, Rijpma SR, van de Vegte-Bolmer M, et al: **Comparative assessment of *An.***  
570 ***gambiae* and *An. stephensi* mosquitoes to determine transmission-reducing**  
571 **activity of antibodies against *P. falciparum* sexual stage antigens.** *Parasit Vectors*  
572 2017, **10**:489.
- 573 21. Miura K, Deng B, Tullo G, Diouf A, Moretz SE, Locke E, Morin M, Fay MP, Long CA:  
574 **Qualification of standard membrane-feeding assay with *Plasmodium falciparum***  
575 **malaria and potential improvements for future assays.** *PLoS One* 2013, **8**:e57909.
- 576 22. Glynn SA, Klein HG, Ness PM: **The red blood cell storage lesion: the end of the**  
577 **beginning.** *Transfusion* 2016, **56**:1462-1468.
- 578 23. D'Alessandro A, Kriebardis AG, Rinalducci S, Antonelou MH, Hansen KC, Papassideri  
579 IS, Zolla L: **An update on red blood cell storage lesions, as gleaned through**  
580 **biochemistry and omics technologies.** *Transfusion* 2015, **55**:205-219.
- 581 24. D'Alessandro A, Gray AD, Szczepiorkowski ZM, Hansen K, Herschel LH, Dumont LJ:  
582 **Red blood cell metabolic responses to refrigerated storage, rejuvenation, and**  
583 **frozen storage.** *Transfusion* 2017, **57**:1019-1030.



- 584 25. Yurkovich JT, Palsson BO: **Quantitative -omic data empowers bottom-up systems**  
585 **biology.** *Curr Opin Biotechnol* 2018, **51**:130-136.
- 586 26. Fabricant L, Kiraly L, Wiles C, Differding J, Underwood S, Deloughery T, Schreiber M:  
587 **Cryopreserved deglycerolized blood is safe and achieves superior tissue**  
588 **oxygenation compared with refrigerated red blood cells: a prospective**  
589 **randomized pilot study.** *J Trauma Acute Care Surg* 2013, **74**:371-376; discussion 376-  
590 377.
- 591 27. Bohoněk M: **Cryopreservation of Blood.** In *Blood Transfusion in Clinical Practice*  
592 (Kochhar P ed. pp. 233-242: InTech; 2012:233-242.
- 593 28. Goheen MM, Clark MA, Kasthuri RS, Cerami C: **Biopreservation of RBCs for in vitro**  
594 ***Plasmodium falciparum* culture.** *Br J Haematol* 2016, **175**:741-744.
- 595 29. Armistead JS, Adams JH: **Advancing Research Models and Technologies to**  
596 **Overcome Biological Barriers to *Plasmodium vivax* Control.** *Trends Parasitol* 2018,  
597 **34**:114-126.
- 598 30. Hopperus Burna APCC, van Thiel PPAM, Lobel HO, Ohrt C, van Ameijden EJC, Veltink  
599 RL, Tendeloo DCH, van Gool T, Green MD, Todd GD, et al: **Long-Term Malaria**  
600 **Chemoprophylaxis with Mefloquine in Dutch Marines in Cambodia.** *Journal of*  
601 *Infectious Diseases* 1996, **173**:1506-1509.
- 602 31. Rózsa L, Reiczigel J, Majoros G: **Quantifying Parasites in Samples of Hosts.** *Journal*  
603 *of Parasitology* 2000, **86**:228-232.
- 604 32. Dotson EM: **Methods in *Anopheles* Research.** pp. 1-4082016:1-408.
- 605 33. Goheen MM, Campino S, Cerami C: **The role of the red blood cell in host defence**  
606 **against falciparum malaria: an expanding repertoire of evolutionary alterations.** *Br*  
607 *J Haematol* 2017, **179**:543-556.

- 608 34. Bolker BM, Brooks ME, Clark CJ, Geange SW, Poulsen JR, Stevens MH, White JS:  
609 **Generalized linear mixed models: a practical guide for ecology and evolution.**  
610 *Trends Ecol Evol* 2009, **24**:127-135.
- 611 35. Harrison XA, Donaldson L, Correa-Cano ME, Evans J, Fisher DN, Goodwin CED,  
612 Robinson BS, Hodgson DJ, Inger R: **A brief introduction to mixed effects modelling**  
613 **and multi-model inference in ecology.** *PeerJ* 2018, **6**:e4794.
- 614 36. Schielzeth H, Nakagawa S, Freckleton R: **Nested by design: model fitting and**  
615 **interpretation in a mixed model era.** *Methods in Ecology and Evolution* 2013, **4**:14-24.
- 616 37. Sutteck A: **Cryopreservation of red blood cells and platelets.** *Methods Mol Biol* 2007,  
617 **368**:283-301.
- 618 38. Carter R, Miller LH: **Evidence for environmental modulation of gametocytogenesis**  
619 **in *Plasmodium falciparum* in continuous culture.** *Bull World Health Organ* 1979, **57**  
620 **Suppl 1**:37-52.
- 621 39. Alano P: ***Plasmodium falciparum* gametocytes: still many secrets of a hidden life.**  
622 *Mol Microbiol* 2007, **66**:291-302.
- 623 40. Jiang X, Peery A, Hall AB, Sharma A, Chen XG, Waterhouse RM, Komissarov A, Riehle  
624 MM, Shouche Y, Sharakhova MV, et al: **Genome analysis of a major urban malaria**  
625 **vector mosquito, *Anopheles stephensi*.** *Genome Biol* 2014, **15**:459.
- 626 41. Blagborough AM, Delves MJ, Ramakrishnan C, Lal K, Butcher G, Sinden RE:  
627 **Assessing transmission blockade in *Plasmodium* spp.** *Methods Mol Biol* 2013,  
628 **923**:577-600.
- 629 42. RStudio Team: **RStudio: Integrated Development Environment for R.** Boston, MA:  
630 RStudio, Inc.; 2016.
- 631 43. R Core Team: **R: A Language and Environment for Statistical Computing.** Vienna,  
632 Austria: R Foundation for Statistical Computing; 2018.

- 633 44. Bates D, Mächler M, Bolker B, Walker S: **Fitting Linear Mixed-Effects Models**  
634 **Usinglme4**. *Journal of Statistical Software* 2015, **67**.
- 635 45. Lenth RV: **Least-Squares Means: TheRPackageIsmmeans**. *Journal of Statistical*  
636 *Software* 2016, **69**.
- 637 46. Lüdtke D: **sjPlot: Data Visualization for Statistics in Social Science**. 2018.
- 638 47. Lüdtke D: **sjstats: Statistical Functions for Regression Models (Version 0.17.0)**.  
639 2018.
- 640 48. Wickham H: *ggplot2: Elegant Graphics for Data Analysis*. New York: Springer-Verlag;  
641 2016.

642

643

644

645

646

647

648

649

650

651

652

653

654 **Figure 1:** a) Rates of mature gametocytemia of *P. falciparum* NF54 cultured *in vitro* in  
655 refrigerated (continuous line) or cryo-preserved (dashed line) RBCs and b), rates of  
656 gametocytemia in RBCs cryo-preserved within 3-4 days of collection from each donor and  
657 thawed after 1 (closed squares), 4 (closed circles), 8 (closed triangles) and 12 weeks (closed  
658 diamonds) of storage. Data represents mean  $\pm$  standard errors (se).

659 **Figure 2:** Prevalence of a) oocysts and b) sporozoites in midguts and salivary glands  
660 respectively of *An. stephensi* mosquitoes infected with ~0.1% mature gametocytemia of *P.*  
661 *falciparum* NF54. Each data point represents an SMFA where mosquitoes were provided a  
662 blood-meal spiked with mature ex-flagellation competent gametocytes collected from the flasks  
663 depicted in Figure 1 and cultured in RBCs refrigerated (4°C), cryo-preserved (“Cryo”) for  $\leq$ 1  
664 week, or following storage for 4, 8 and 12 weeks. See additional file 2 for graphical  
665 representation of the study design and additional file 4 demonstrating variation in oocyst  
666 prevalence between experimental blocks.

667 **Figure 3:** Oocyst a) abundance (oocyst counts from all midguts regardless of infection status)  
668 and b) intensity (oocyst counts from infected midguts only) in mosquitoes depicted in figure 2a.  
669 Horizontal bars represent group means with each data point representing oocyst counts from an  
670 individual mosquito midgut. For visualization purposes, counts were jittered horizontally to 40%  
671 but not vertically to maintain alignment with the gradient on the y-axis.

672 **Table 1:** outputs of the statistical models

673

674

675

676

677 **Additional file 1.** File format: “pdf”. Title of data: A schematic of the overall study design.  
678 Description of data: RBCs 3-4 days old post-collection were either refrigerated at 4°C or cryo-  
679 preserved in the gaseous phase of liquid nitrogen. Aliquots of RBCs were thawed at 1, 4, 8 and  
680 12 weeks and assessed for their ability to support 1) gametocytogenesis of *P. falciparum* NF54  
681 *in vitro* and 2) gametogenesis *in vivo* relative to refrigerated RBCs which served as the  
682 reference (dashed arrows). Black continuous arrows indicate procedures that were common to  
683 all treatments.

684 **Additional file 2:** File format: “pdf”. Title of data: A detailed schematic of the experimental  
685 design describing biological replication and testing regime. Description of data: a.) The  
686 sequence of steps in an experimental block with design objectives in parentheses. See main  
687 text for details. b.) Testing regime to demonstrate how RBCs from 4 independent donors were  
688 used to compare storage method (refrigeration vs. cryo-preservation) and duration of storage.  
689 The colored lines connecting each data point indicate which donors were tested within an  
690 experimental block/unit. While the comparison between storage methods was performed for  
691 donors 1 and 4 in a nested experimental design, the comparisons for storage duration  
692 encompassed a partially crossed design with at least 2-3 donors tested at 4, 8 and 12 weeks  
693 respectively with repeated sampling of 3 of the 4 total donors at various periods following cryo-  
694 preservation. For instance, RBCs from donor 3 was tested following 4 and 8 weeks of cryo-  
695 preservation in experimental blocks 3 and 4 respectively. Additionally, in block 3 (green lines),  
696 donors 1 and 2 were also tested after cryo-preservation for 12 and 8 weeks respectively along  
697 with donor 3 whose RBCs had been stored for 4 weeks by then.

698 **Additional file 3:** File format: “pdf”. Title of data: Variation between experimental blocks in the  
699 prevalence of *P. falciparum* NF54 oocysts in midguts of *An. stephensi*. Description of data: Each  
700 data point within an experimental block represents an individual SMFA performed within the

701 same block as depicted in Additional file 2. Horizontal bars represent mean prevalence within  
702 each block.

703 **Additional file 4:** File format: “pdf”. Title of data: Representative images used to classify the  
704 various stages of *P. falciparum* NF54 during this study. Description of data: a.) Giemsa-stained  
705 images of male gametocytes (1000x, oil immersion, brightfield), b.) Giemsa-stained images of  
706 female gametocytes (100x, oil immersion, brightfield), c.) Ex-flagellation of gametocytes *in vitro*  
707 with arrowheads depicting flagella (400x DIC, unstained), d.) An oocyst with enclosed  
708 sporozoites (arrowheads, 400x, DIC, unstained), e.) ruptured salivary glands with freed  
709 sporozoites (arrowheads) at 100x (i.) and 400x (ii) (DIC, unstained). Images were captured with  
710 an LG G3 or Samsung Galaxy S7 smartphone using default settings (“Auto”) while attached to  
711 the eyepieces on the microscope with a custom-designed apparatus. Except panel e, all images  
712 were digitally magnified up to 4x for presentation purposes.

713 **Additional file 5:** File format: “pdf”. Title of data: Cryo-preserved RBCs support SMFAs with a  
714 Cambodian isolate of *P. falciparum*. Description of data: a) Oocyst and sporozoite prevalence,  
715 b) oocyst abundance and c) intensity of *P. falciparum* CB132 in female *An. stephensi* infected  
716 with mature gametocytes of *P. falciparum* CB132 cultured in RBCs from donor 4 (Additional file  
717 2) thawed following cryo-preservation for 6 (left panel) or 8 weeks (right panel). Female 3 to 5-  
718 day old *An. stephensi* mosquitoes were provided an infectious blood-meal spiked with ~0.6%  
719 mature gametocytes and oocyst prevalence and abundance recorded at 12 days post-infection  
720 and sporozoite prevalence at 17 days post-infection. Horizontal bars represent group means  
721 with each data point representing oocyst counts from an individual mosquito midgut. For  
722 visualization purposes, counts were jittered horizontally to 40% but not vertically to maintain  
723 alignment with the gradient on the y-axis. NA=not available.

724

**Fig 1a**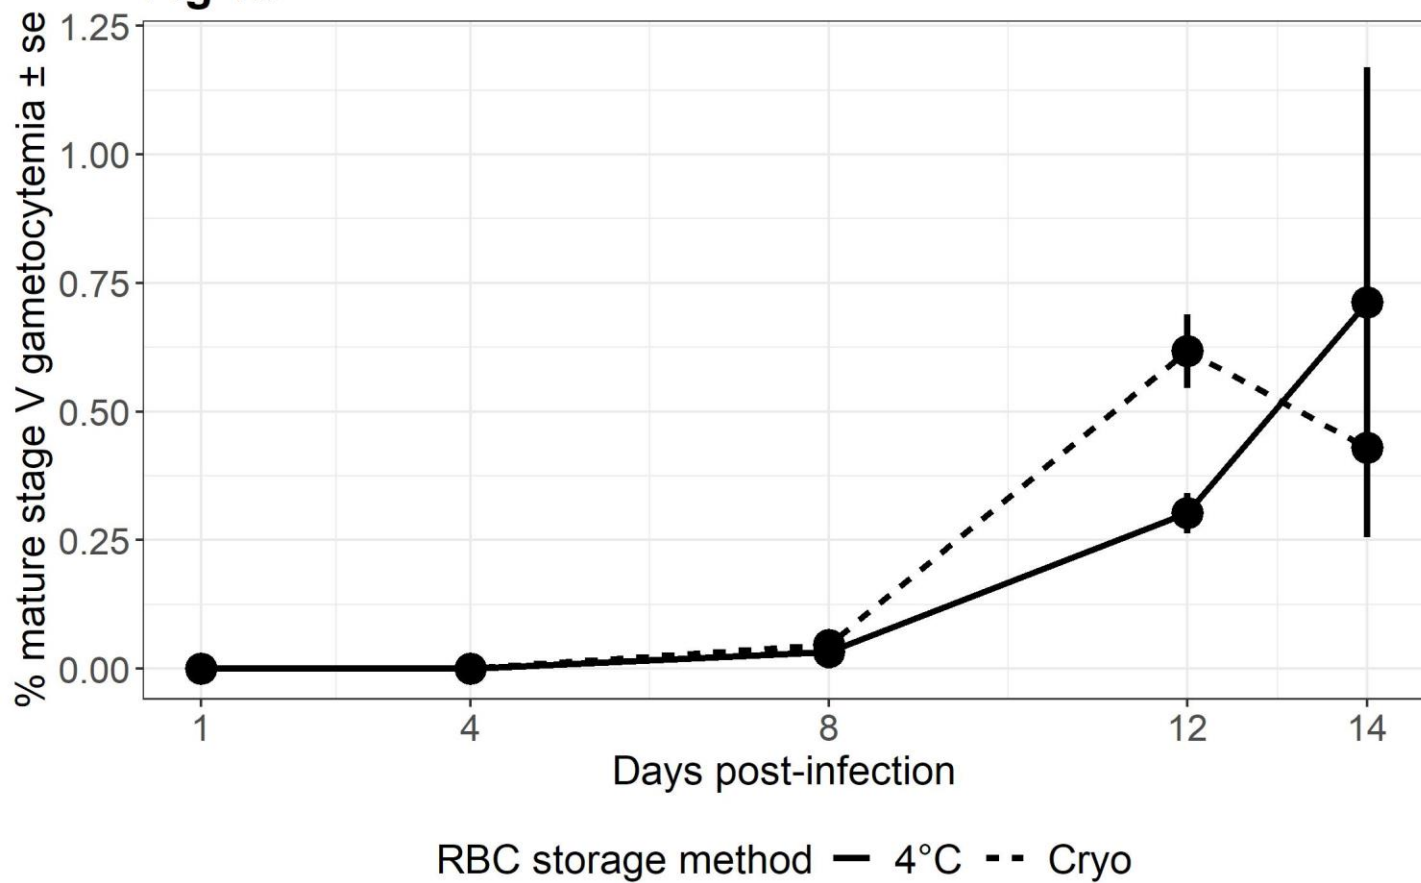**Fig 1b**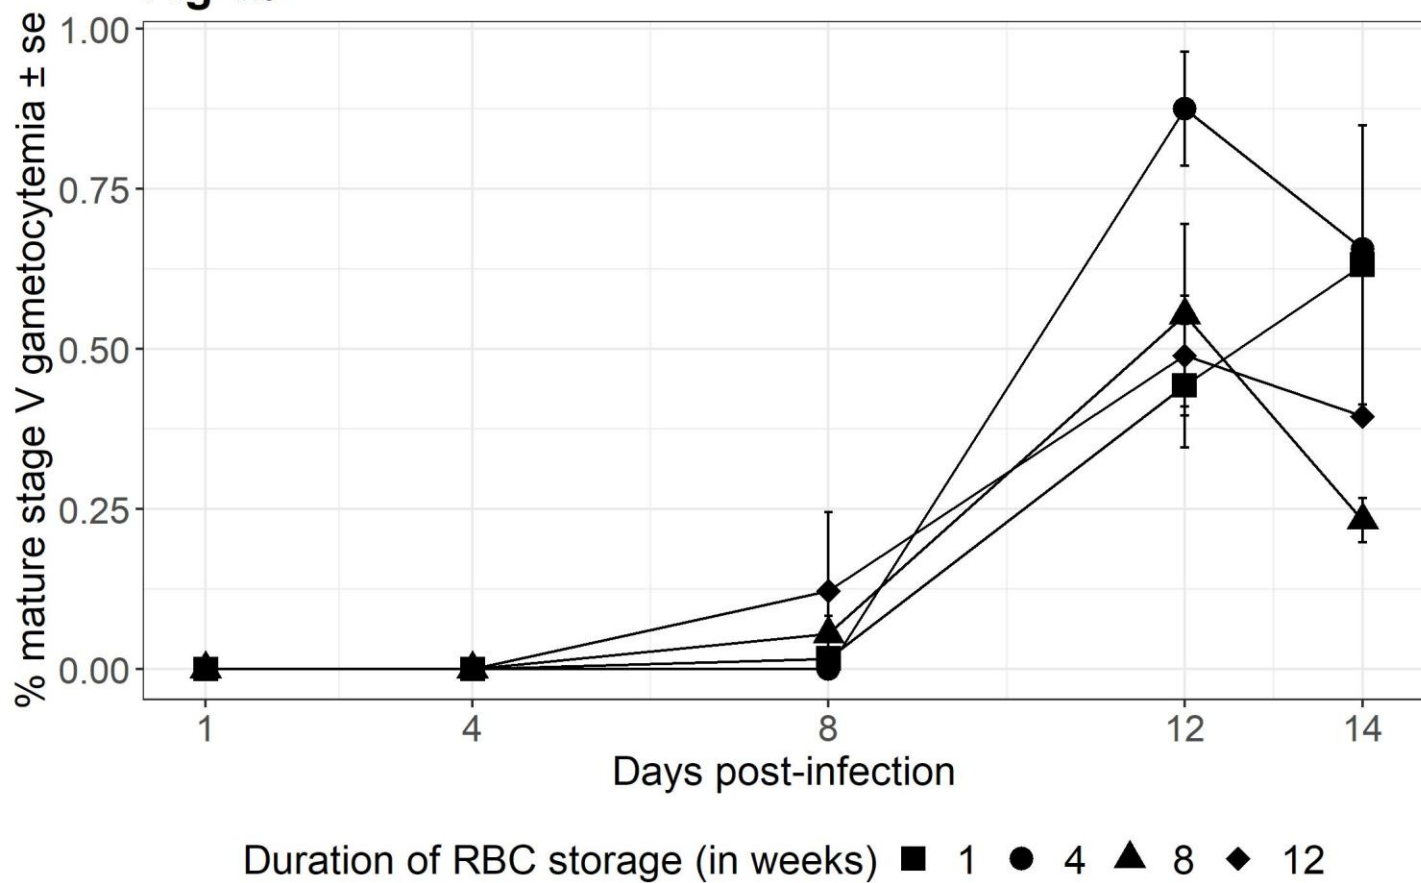

**Fig. 2a**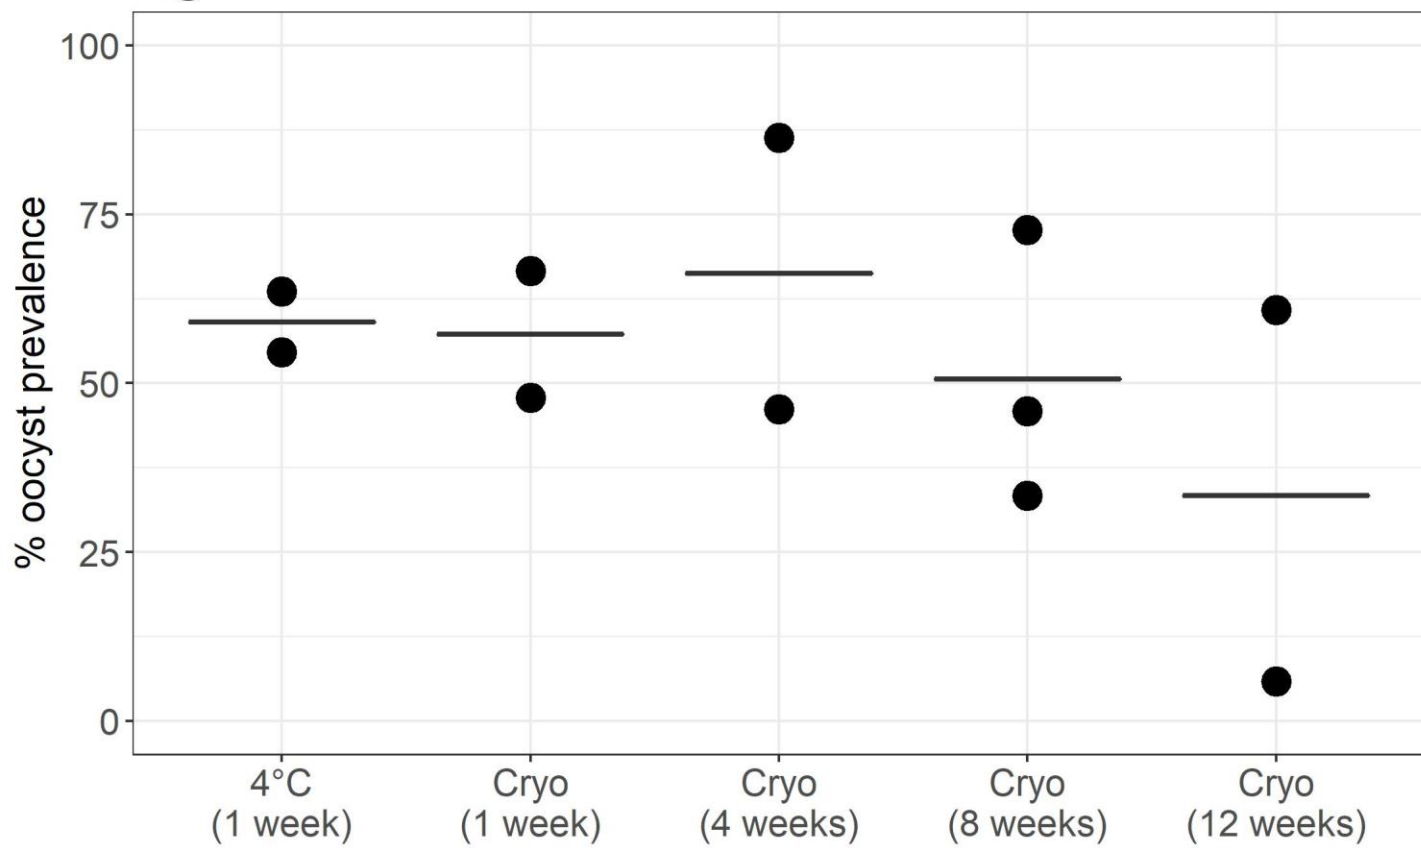**Fig. 2b**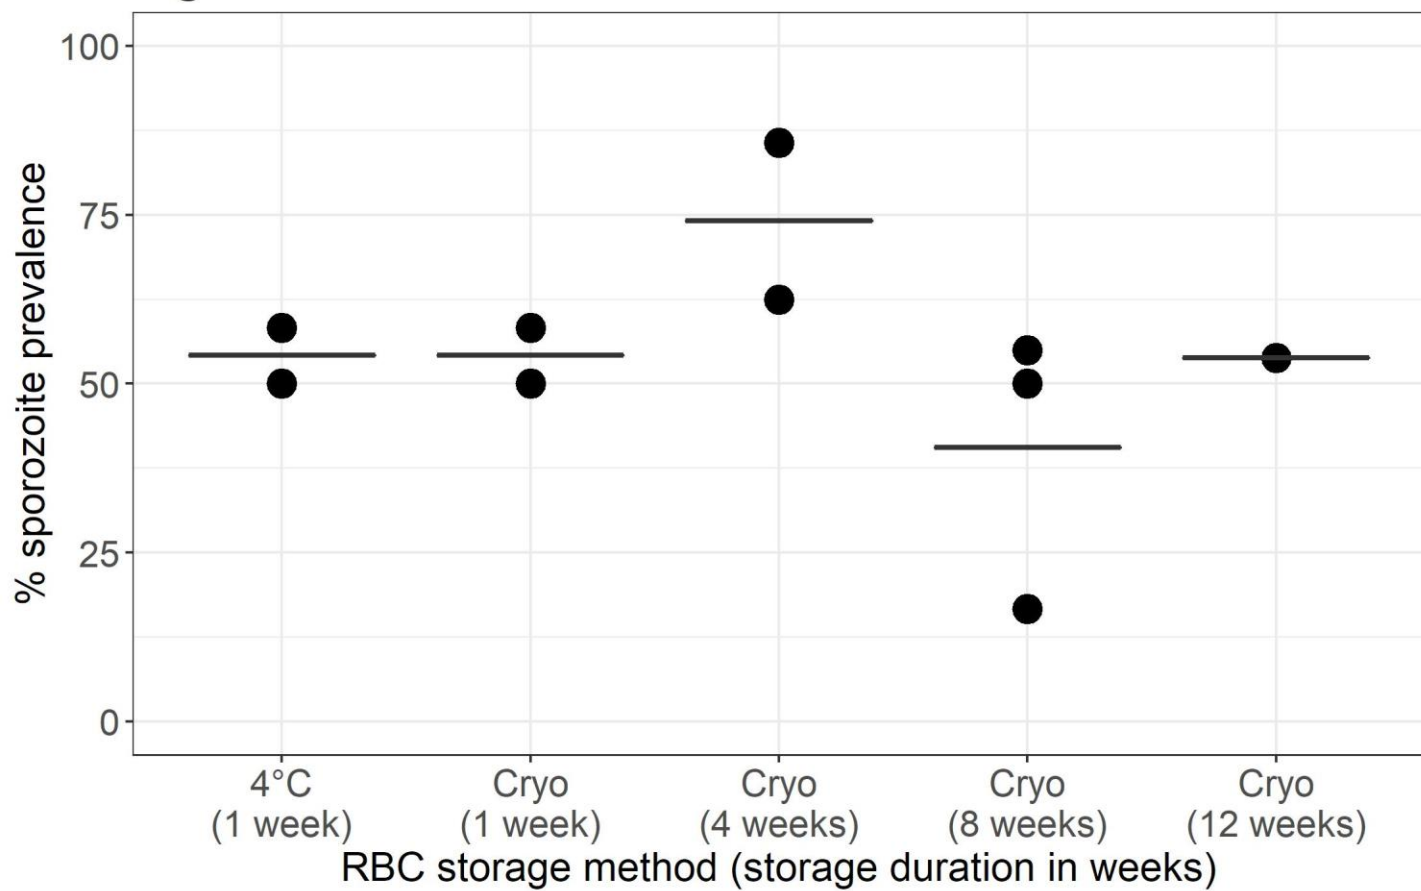



**Fig 3a**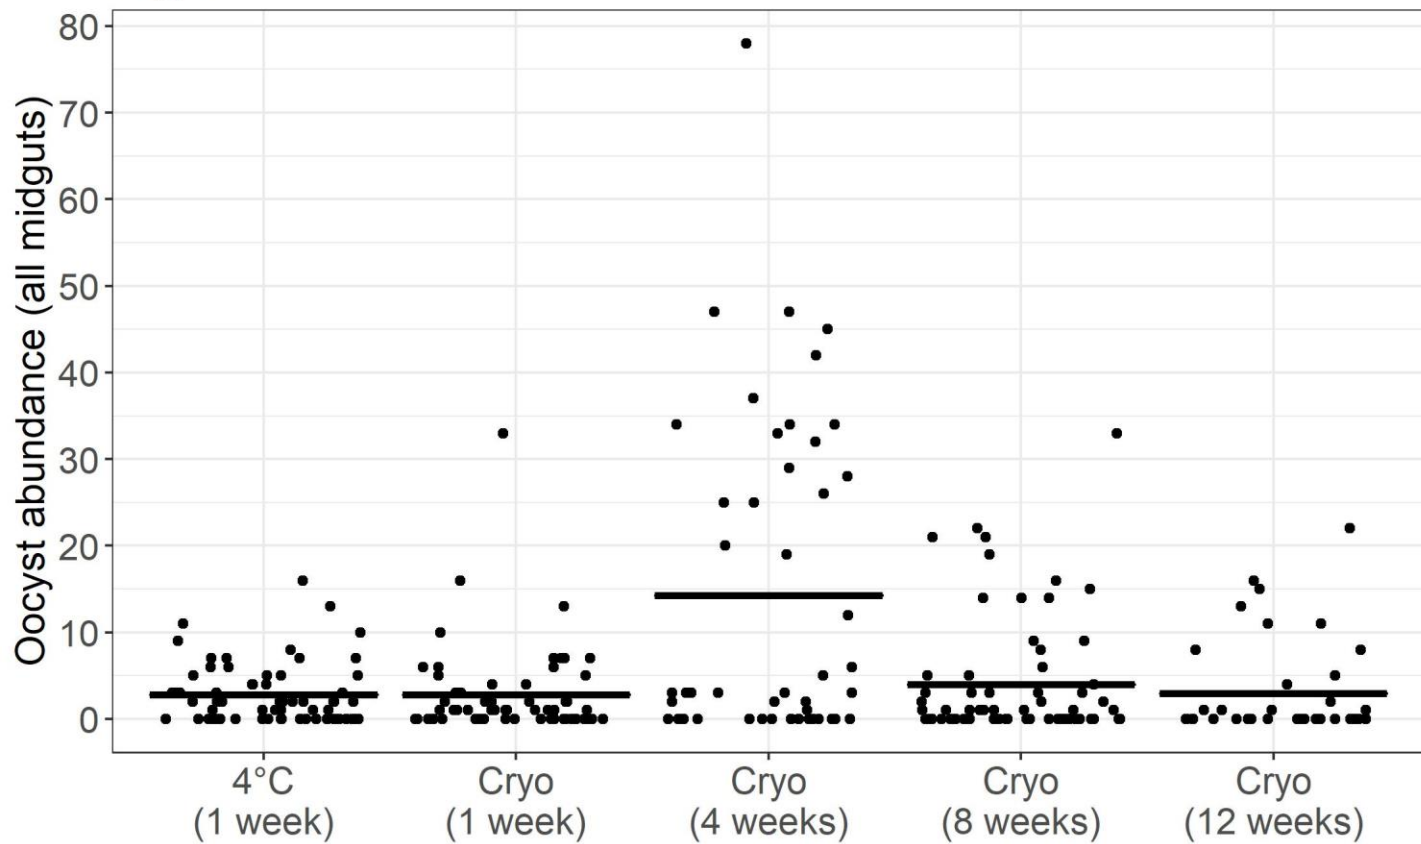**Fig 3b**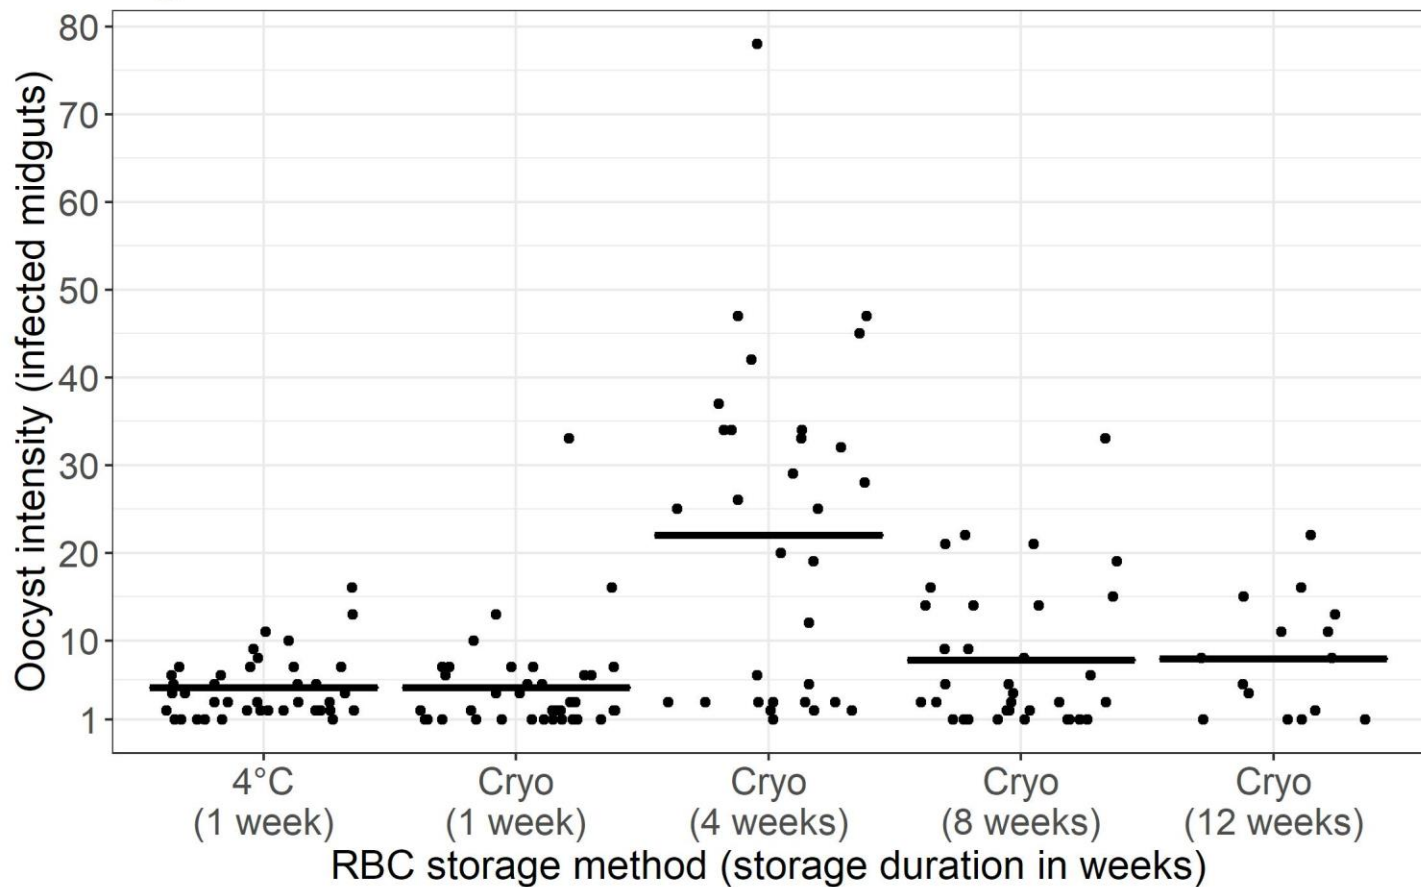

**Table 1**

| Dependent variable →                                                       | Gametocytemia <i>in vitro</i> (male + female stage V)                                              |            |                 | Oocyst prevalence in mosquito midguts |            |                 | Sporozoite prevalence in salivary glands |            |                 | Oocyst abundance (infected and uninfected midguts) |            |                 | Oocyst intensity (infected midguts only) |            |                 |
|----------------------------------------------------------------------------|----------------------------------------------------------------------------------------------------|------------|-----------------|---------------------------------------|------------|-----------------|------------------------------------------|------------|-----------------|----------------------------------------------------|------------|-----------------|------------------------------------------|------------|-----------------|
|                                                                            | IRR <sup>a</sup>                                                                                   | std. Error | <i>p</i> -value | OR <sup>a</sup>                       | std. Error | <i>p</i> -value | OR <sup>a</sup>                          | std. Error | <i>p</i> -value | IRR <sup>a</sup>                                   | std. Error | <i>p</i> -value | IRR <sup>a</sup>                         | std. Error | <i>p</i> -value |
| <b>Fixed Effects</b>                                                       |                                                                                                    |            |                 |                                       |            |                 |                                          |            |                 |                                                    |            |                 |                                          |            |                 |
| (Intercept)                                                                | 0.00                                                                                               | 0.00       | <.001           | 1.09                                  | 0.52       | 0.86            | 0.82                                     | 0.50       | 0.75            | 1.96                                               | 0.85       | 0.43            | 5.19                                     | 0.48       | <.001           |
| 4°C RBCs vs Cryo-RBCs                                                      | 1.31                                                                                               | 0.41       | 0.40            | 1.05                                  | 0.38       | 0.89            | 1.35                                     | 0.84       | 0.63            | 1.20                                               | 0.71       | 0.80            | 1.12                                     | 0.36       | 0.75            |
| Duration of storage                                                        | 1.01                                                                                               | 0.04       | 0.72            | 0.89                                  | 0.06       | 0.07            | 0.93                                     | 0.08       | 0.36            | 0.86                                               | 0.10       | 0.13            | 0.95                                     | 0.07       | 0.48            |
| <b>Experimental design</b>                                                 |                                                                                                    |            |                 |                                       |            |                 |                                          |            |                 |                                                    |            |                 |                                          |            |                 |
| Total flasks/mosquito infections (SMFAs), nested within experimental block | 11                                                                                                 |            |                 | 11                                    |            |                 | 10 <sup>b</sup>                          |            |                 | 11                                                 |            |                 | 11                                       |            |                 |
| Total number of experimental blocks                                        | 5                                                                                                  |            |                 | 5                                     |            |                 | 5                                        |            |                 | 5                                                  |            |                 | 5                                        |            |                 |
| Total no. of RBC donors tested                                             | 4                                                                                                  |            |                 | 4                                     |            |                 | 4                                        |            |                 | 4                                                  |            |                 | 4                                        |            |                 |
| Total number of observations                                               | 51                                                                                                 |            |                 | 283                                   |            |                 | 235                                      |            |                 | 283                                                |            |                 | 157                                      |            |                 |
| <b>Random effects</b>                                                      |                                                                                                    |            |                 |                                       |            |                 |                                          |            |                 |                                                    |            |                 |                                          |            |                 |
| <u>Group structure and variance for random effects</u>                     |                                                                                                    |            |                 |                                       |            |                 |                                          |            |                 |                                                    |            |                 |                                          |            |                 |
| Flasks/SMFAs nested within experimental block                              | 0.00                                                                                               |            |                 | 0.00                                  |            |                 | 0.26                                     |            |                 | 0.43                                               |            |                 | 0.10                                     |            |                 |
| Experimental block                                                         | 0.16                                                                                               |            |                 | 0.35                                  |            |                 | 0.00                                     |            |                 | 0.77                                               |            |                 | 0.40                                     |            |                 |
| RBC donor                                                                  | 0.00                                                                                               |            |                 | 0.17                                  |            |                 | 0.02                                     |            |                 | 0.46                                               |            |                 | 0.21                                     |            |                 |
| <u>Overdispersion tests</u>                                                |                                                                                                    |            |                 |                                       |            |                 |                                          |            |                 |                                                    |            |                 |                                          |            |                 |
| Dispersion ratio                                                           | 0.98                                                                                               |            |                 | 1.23                                  |            |                 | 1.00                                     |            |                 | 0.75                                               |            |                 | 1.07                                     |            |                 |
| <i>p</i> -value                                                            | 0.50                                                                                               |            |                 | 0.29                                  |            |                 | 0.40                                     |            |                 | 1.00                                               |            |                 | 0.27                                     |            |                 |
| <u>Notes</u>                                                               |                                                                                                    |            |                 |                                       |            |                 |                                          |            |                 |                                                    |            |                 |                                          |            |                 |
| GLMM family (link)                                                         | poisson (log)                                                                                      |            |                 | binomial (logit)                      |            |                 | binomial (logit)                         |            |                 | negative binomial (log)                            |            |                 | negative binomial (log)                  |            |                 |
| Abbreviations <sup>a</sup>                                                 | IRR= Incidence rate ratios, NA=not applicable, OR=Odds ratios                                      |            |                 |                                       |            |                 |                                          |            |                 |                                                    |            |                 |                                          |            |                 |
| Comments <sup>b</sup>                                                      | <sup>b</sup> no of infections is lower as sporozoite prevalence was not available from 1 infection |            |                 |                                       |            |                 |                                          |            |                 |                                                    |            |                 |                                          |            |                 |

# Additional file 1

## Fresh RBCs, 3-4 days/<1 week post-collection

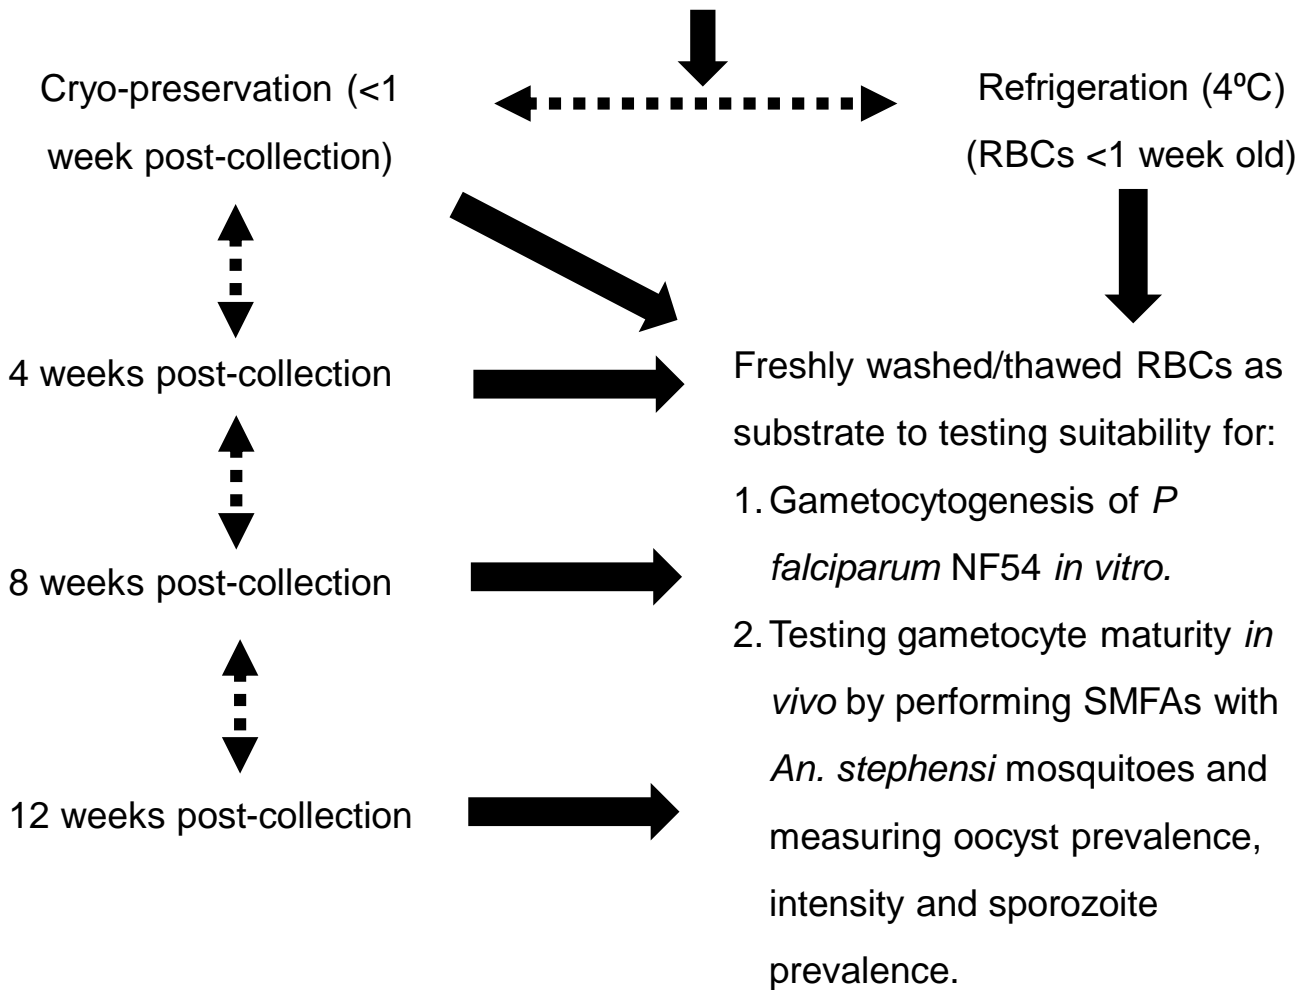

## Additional file 2a

### Components of an experimental block

1. Asexual cultures for 2-4 days (Same asexual seed culture/cohort)
2. Gametocyte flasks for 14-16 days (2-3 flasks comparing storage methods with same donor or various donors following 4, 8, or 12 weeks of cryo-preservation.
3. SMFAs (2-3) representing each treatment (with same mosquito cohort)

## Additional file 2b

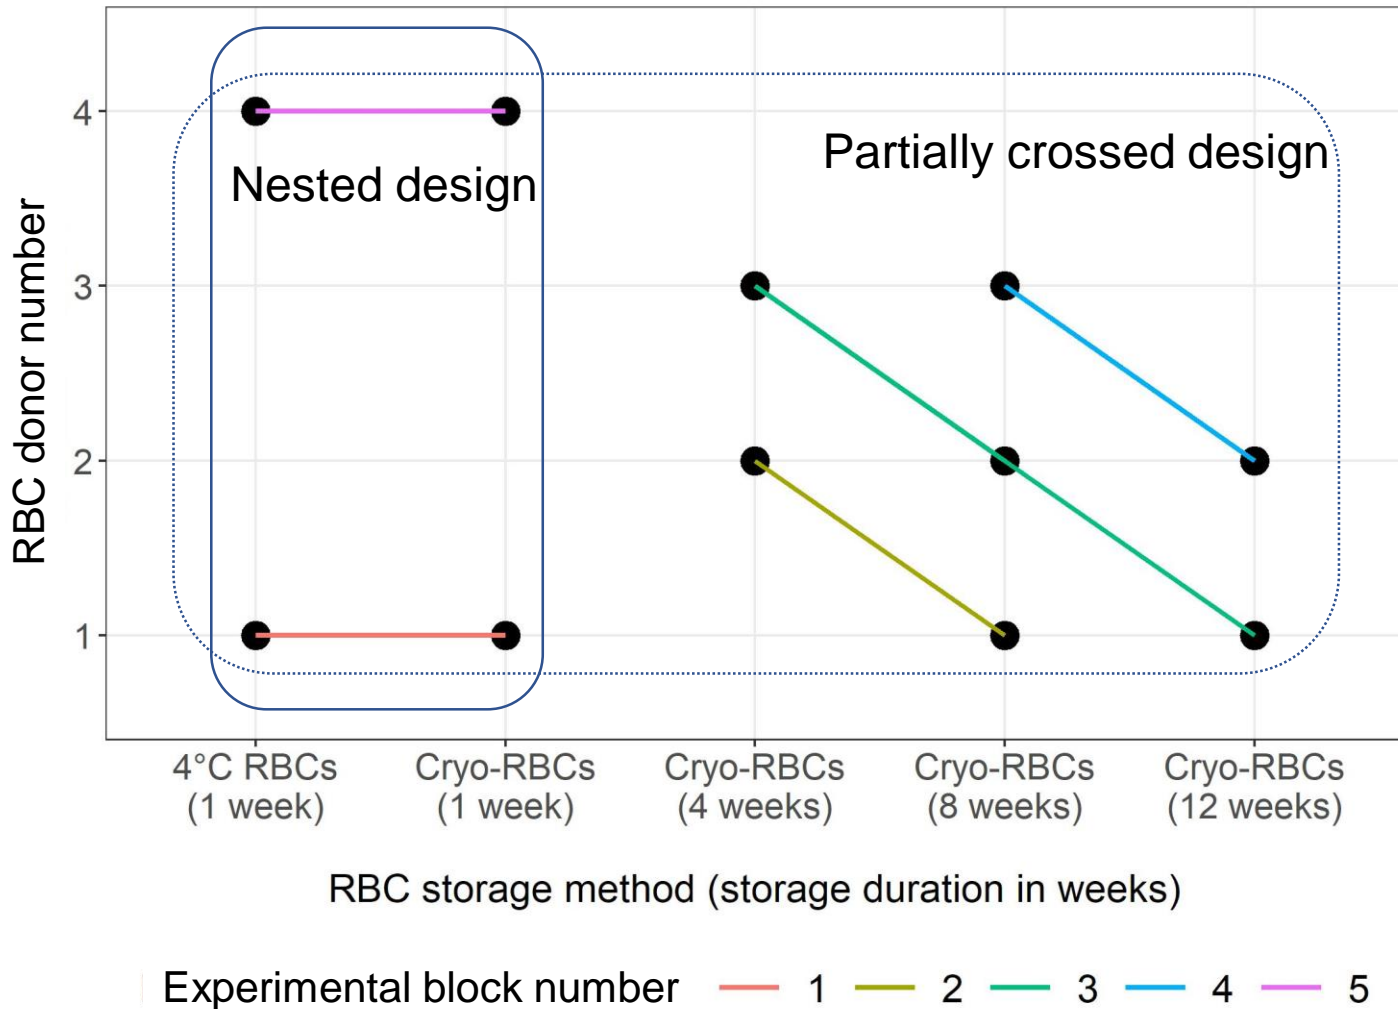

### Additional file 3

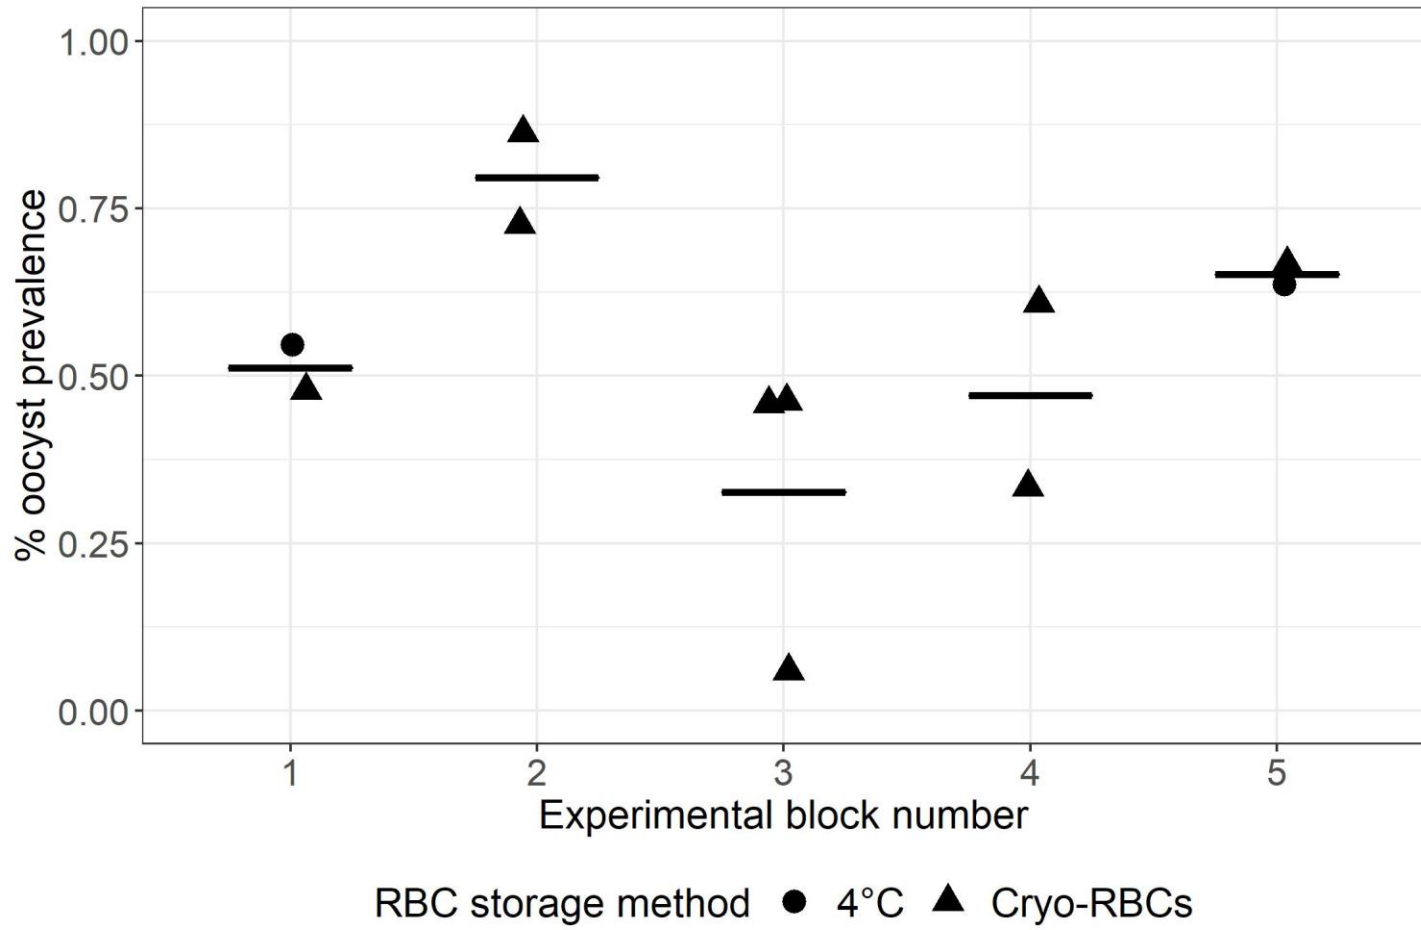

**Additional file 4a**

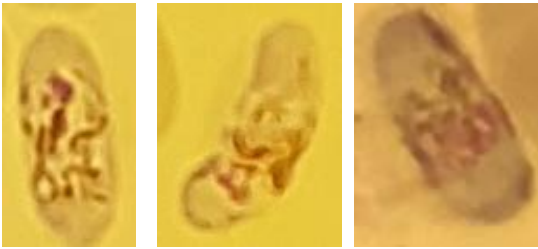

**Additional file 4b**

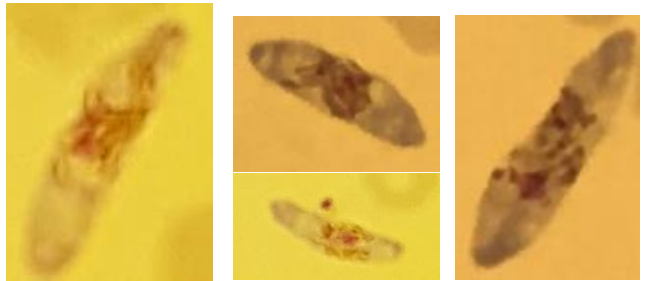

**Additional file 4c**

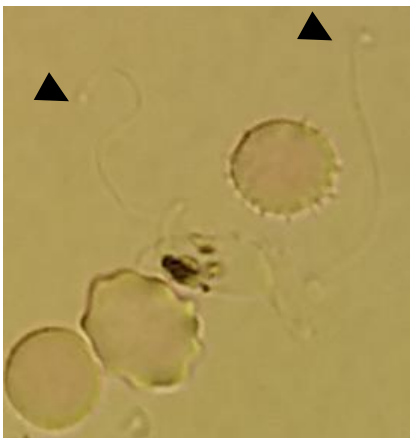

**Additional file 4d**

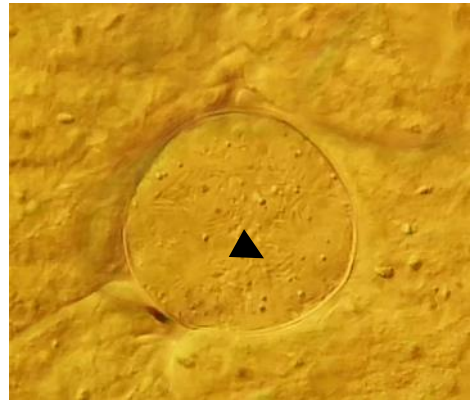

**Additional file 4e**

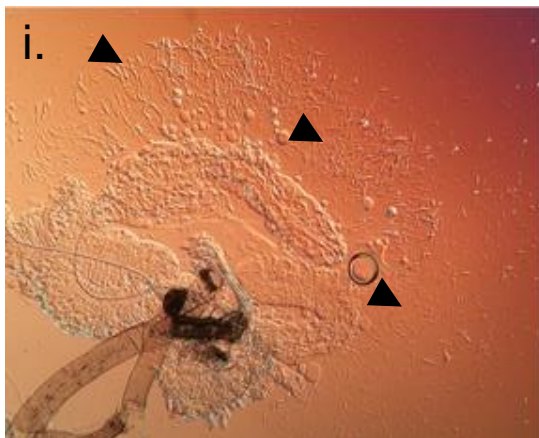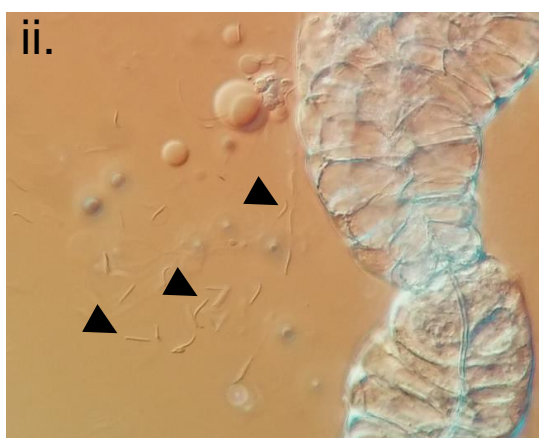

### Additional file 5a

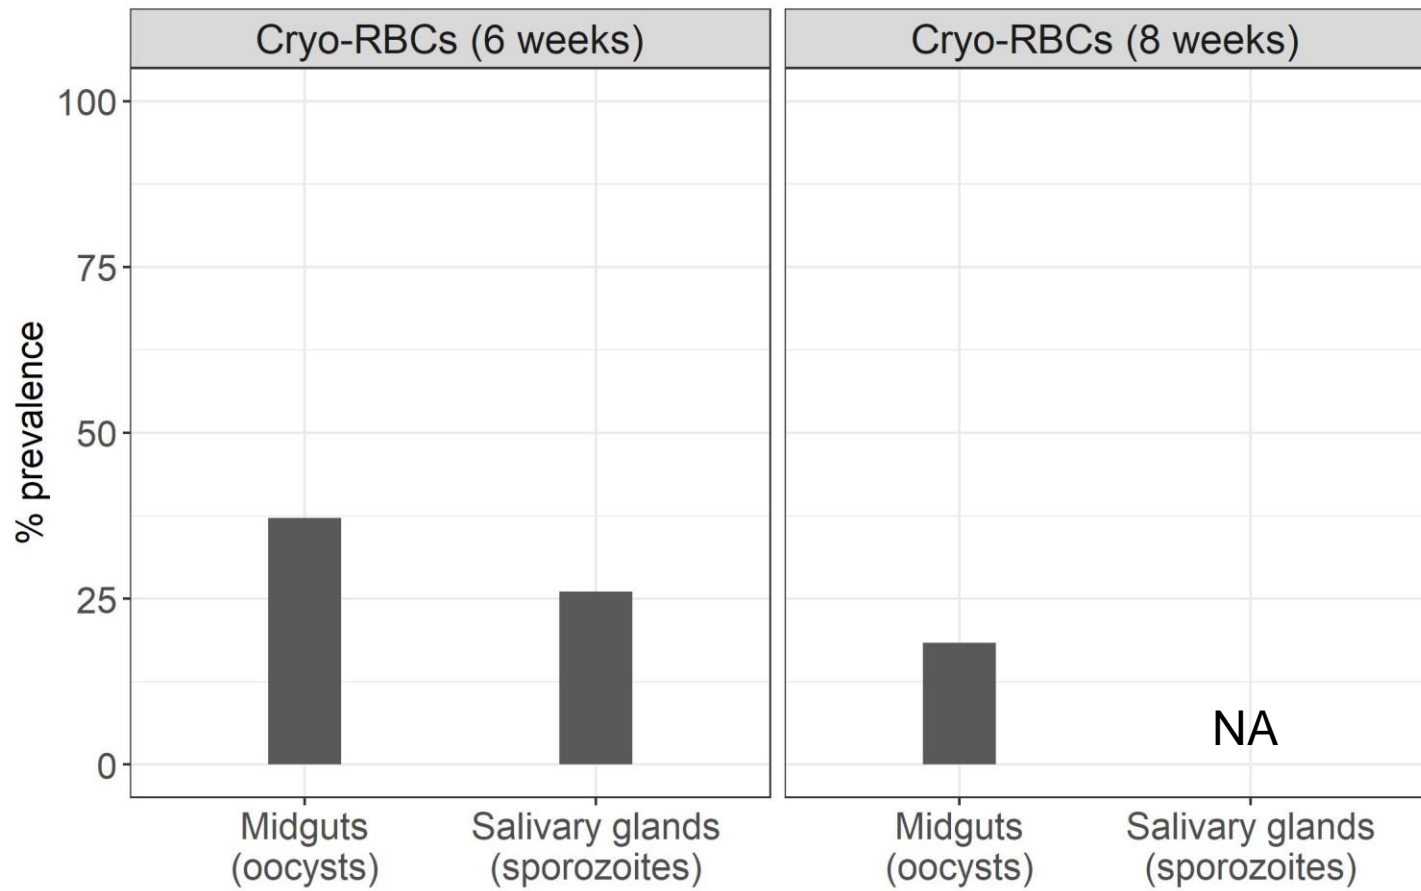

### Additional file 5b

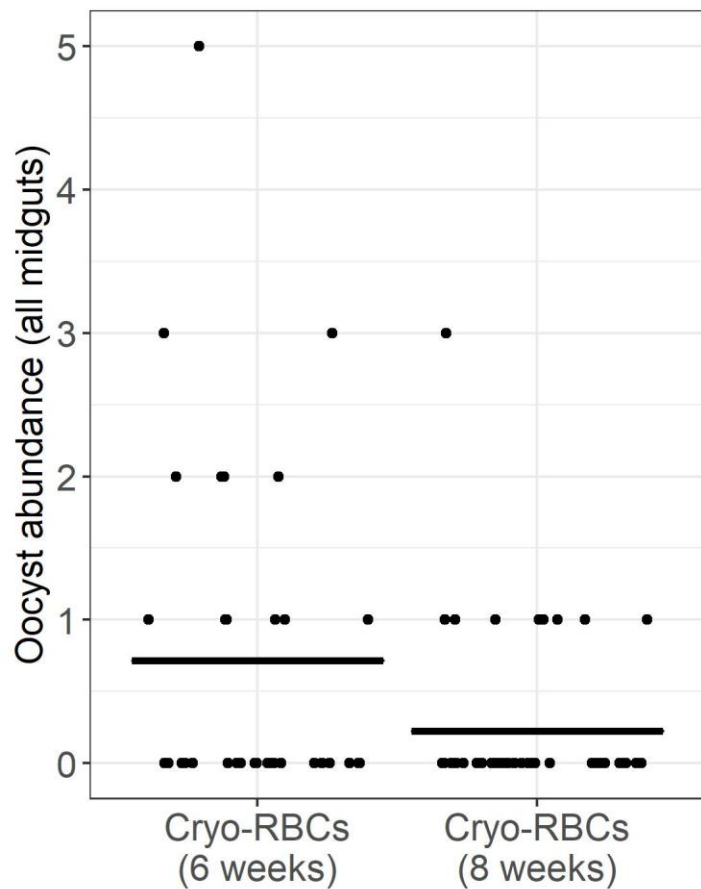

### Additional file 5c

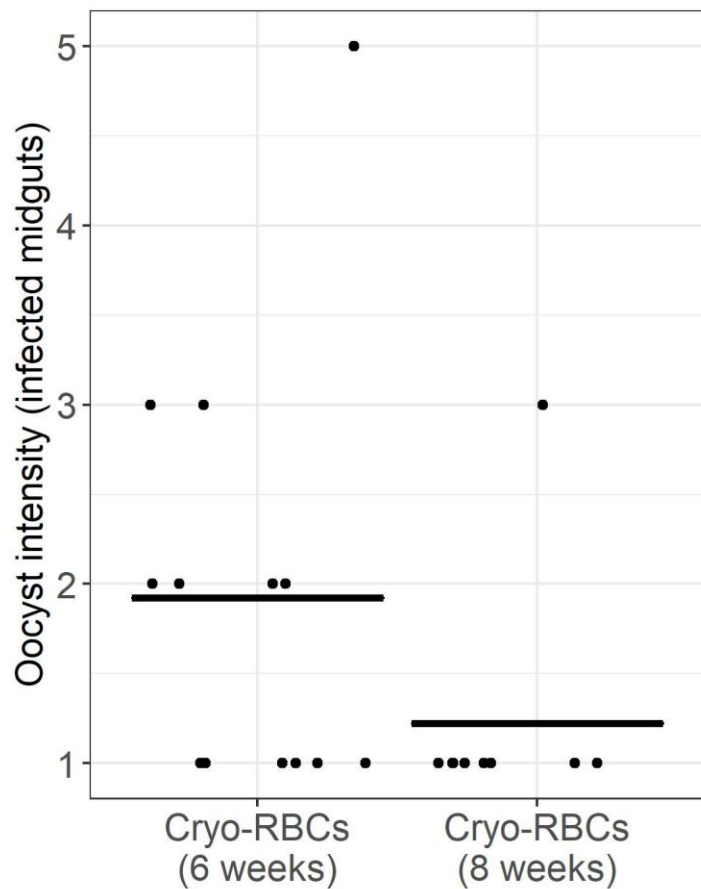

Source: https://www.biorxiv.org/content/10.1101/405001v1.full.pdf
